# Supplementary material for: Effect of Prophylactic Fibrinogen Concentrate In Scoliosis Surgery (EFISS): a study protocol of two-arm, randomised trial
Source: PubMed Central journal article supplement — BMJ Open. 2023 May 26;13(5):e071547. doi: 10.1136/bmjopen-2022-071547 (PMC10230982; doi:10.1136/bmjopen-2022-071547), 2023-05-26
Supplement: bmjopen-2022-071547.draft_revisions.pdf [file bmjopen-2022-071547.draft_revisions.pdf]

# BMJ Open

BMJ Open is committed to open peer review. As part of this commitment we make the peer review history of every article we publish publicly available.

When an article is published we post the peer reviewers' comments and the authors' responses online. We also post the versions of the paper that were used during peer review. These are the versions that the peer review comments apply to.

The versions of the paper that follow are the versions that were submitted during the peer review process. They are not the versions of record or the final published versions. They should not be cited or distributed as the published version of this manuscript.

BMJ Open is an open access journal and the full, final, typeset and author-corrected version of record of the manuscript is available on our site with no access controls, subscription charges or pay-per-view fees (<http://bmjopen.bmj.com>).

If you have any questions on BMJ Open's open peer review process please email [info.bmjopen@bmj.com](mailto:info.bmjopen@bmj.com)

# BMJ Open

## Effect of Prophylactic Fibrinogen Concentrate In Scoliosis Surgery (EFISS): a study protocol of two-arm, randomised trial

|                               |                                                                                                                                                                                                                                                                                                                                                                                                                                                                                                                                                                                                                                                                                                                                                                                                                                                                                                                                                                                                                                                                                                                                                                                                                                                                                                                                                                                                                                                                                                                                                                                                |
|-------------------------------|------------------------------------------------------------------------------------------------------------------------------------------------------------------------------------------------------------------------------------------------------------------------------------------------------------------------------------------------------------------------------------------------------------------------------------------------------------------------------------------------------------------------------------------------------------------------------------------------------------------------------------------------------------------------------------------------------------------------------------------------------------------------------------------------------------------------------------------------------------------------------------------------------------------------------------------------------------------------------------------------------------------------------------------------------------------------------------------------------------------------------------------------------------------------------------------------------------------------------------------------------------------------------------------------------------------------------------------------------------------------------------------------------------------------------------------------------------------------------------------------------------------------------------------------------------------------------------------------|
| Journal:                      | <i>BMJ Open</i>                                                                                                                                                                                                                                                                                                                                                                                                                                                                                                                                                                                                                                                                                                                                                                                                                                                                                                                                                                                                                                                                                                                                                                                                                                                                                                                                                                                                                                                                                                                                                                                |
| Manuscript ID                 | bmjopen-2022-071547                                                                                                                                                                                                                                                                                                                                                                                                                                                                                                                                                                                                                                                                                                                                                                                                                                                                                                                                                                                                                                                                                                                                                                                                                                                                                                                                                                                                                                                                                                                                                                            |
| Article Type:                 | Protocol                                                                                                                                                                                                                                                                                                                                                                                                                                                                                                                                                                                                                                                                                                                                                                                                                                                                                                                                                                                                                                                                                                                                                                                                                                                                                                                                                                                                                                                                                                                                                                                       |
| Date Submitted by the Author: | 02-Jan-2023                                                                                                                                                                                                                                                                                                                                                                                                                                                                                                                                                                                                                                                                                                                                                                                                                                                                                                                                                                                                                                                                                                                                                                                                                                                                                                                                                                                                                                                                                                                                                                                    |
| Complete List of Authors:     | <p>Vrbica, Kamil; University Hospital Brno, Department of Anaesthesiology and Intensive Care Medicine; Masaryk University Faculty of Medicine, Department of Anaesthesiology and Intensive Care Medicine</p> <p>Hudec, Jan; University Hospital Brno, Department of Anaesthesiology and Intensive Care Medicine; Masaryk University Faculty of Medicine, Department of Anaesthesiology and Intensive Care Medicine</p> <p>Hrdy, Ondrej; University Hospital Brno, Department of Anaesthesiology and Intensive Care Medicine; Masaryk University Faculty of Medicine, Department of Anaesthesiology and Intensive Care Medicine</p> <p>Galko, Michal; University Hospital Brno, Department of Orthopaedic Surgery; Masaryk University Faculty of Medicine, Department of Orthopaedic Surgery</p> <p>Horalkova, Hana; University Hospital Brno, Department of Anaesthesiology and Intensive Care Medicine; Masaryk University Faculty of Medicine, Department of Anaesthesiology and Intensive Care Medicine</p> <p>Demlova, Regina; Masaryk University Faculty of Medicine, Department of Pharmacology/CZECRIN</p> <p>Kubelova, Michaela; Masaryk University Faculty of Medicine, Department of Pharmacology/CZECRIN</p> <p>Repko, Martin; University Hospital Brno, Department of Orthopaedic Surgery; Masaryk University Faculty of Medicine, Department of Orthopaedic Surgery</p> <p>Gal, Roman; University Hospital Brno, Department of Anaesthesiology and Intensive Care Medicine; Masaryk University Faculty of Medicine, Department of Anaesthesiology and Intensive Care Medicine</p> |
| Keywords:                     | Scoliosis < ORTHOPAEDIC & TRAUMA SURGERY, PAEDIATRICS, ORTHOPAEDIC & TRAUMA SURGERY, Anaesthesia in orthopaedics < ANAESTHETICS, Blood bank & transfusion medicine < HAEMATOLOGY                                                                                                                                                                                                                                                                                                                                                                                                                                                                                                                                                                                                                                                                                                                                                                                                                                                                                                                                                                                                                                                                                                                                                                                                                                                                                                                                                                                                               |
|                               |                                                                                                                                                                                                                                                                                                                                                                                                                                                                                                                                                                                                                                                                                                                                                                                                                                                                                                                                                                                                                                                                                                                                                                                                                                                                                                                                                                                                                                                                                                                                                                                                |

SCHOLARONE™  
Manuscripts

1  
2  
3  
4 1 **Effect of Prophylactic Fibrinogen Concentrate In Scoliosis**  
5 2 **Surgery (EFISS): a study protocol of two-arm, randomised trial**  
6  
7 3

8 4 Vrbica K<sup>1</sup>, Hudec J<sup>1</sup>, Hrdy O<sup>1</sup>, Galko M<sup>3</sup>, Horalkova H<sup>1</sup>, Demlova R<sup>4</sup>, Kubelova M<sup>4</sup>,  
9 5 Repko M<sup>3</sup>, Gal R<sup>1</sup>  
10 6

11 7  
12 8 1) Department of Anaesthesiology and Intensive Care Medicine, University  
13 9 Hospital Brno and Faculty of Medicine, Masaryk University, Brno, Czech  
14 10 Republic

15 11 2) Department of Orthopaedic Surgery, University Hospital Brno and Faculty of  
16 12 Medicine, Masaryk University, Brno, Czech Republic

17 13 3) Department of Pharmacology/CZECRIN, Faculty of Medicine, Masaryk  
18 14 University, Brno, Czech Republic

19 15 **Correspondence to:** Jan Hudec, hudeja@gmail.com, University Hospital Brno and  
20 16 Faculty of Medicine, Masaryk University, Brno, Jihlavská 20, 625 00 Brno, Czech  
21 17 Republic

22 18 **Word count:** 3486 words  
23 19  
24 20  
25 21  
26 22  
27 23  
28 24  
29 25  
30 26  
31 27  
32 28  
33 29  
34 30  
35 31  
36 32  
37 33  
38 34  
39 35  
40 36  
41 37  
42 38  
43 39  
44 40  
45 41  
46 42  
47 43  
48 44  
49 45  
50 46  
51 47  
52 48  
53 49  
54 50  
55 51  
56 52  
57 53  
58 54  
59 55  
60 56

## 39 **Abstract**

### 41 **Introduction**

42 Fibrinogen is one of the essential coagulation factors. Preoperative lower  
43 plasma fibrinogen level has been associated with higher blood loss. Scoliosis  
44 surgery presents a challenge for the anaesthetic team, one of the reasons being  
45 blood loss and transfusion management. Recently, the prophylactic fibrinogen  
46 administration has been a debated topic in various indications. It has been described  
47 e.g. in urological or cardiovascular surgery, as well as in paediatrics. This pilot study  
48 is focused on verifying the feasibility of potential large randomised trial and verifying  
49 the safety of prophylactic fibrinogen administration in paediatric scoliosis surgery.

### 50 **Methods and analysis**

51 A total of 32 paediatric patients indicated for scoliosis surgery will be  
52 recruited. Participants will be randomised into study groups in a 1:1 allocation ratio.  
53 Patients in the intervention group will receive prophylactic single dose of fibrinogen,  
54 in addition to standard of care. Patients in the control group will receive standard of  
55 care without study medication prior to skin incision. The primary aim is to assess the  
56 safety of prophylactic fibrinogen administration during scoliosis surgery in children,  
57 the incidence of any adverse events (AEs) and reactions will be monitored during  
58 participation in the study. The secondary objective is to investigate the additional  
59 safety information, feasibility and efficacy of a prophylactic fibrinogen administration.  
60 The incidence of AEs and reactions according to selected Adverse Events of Special  
61 Interest will be monitored. All collected data will be subjected to statistical analysis  
62 according to a separate Statistical Analysis Plan.

### 63 **Ethics and dissemination**

64 This trial follows the applicable legislation and requirements for good clinical  
65 practice according to the ICH E6(R2). All essential trial documents were approved by  
66 the relevant ethics committee and national regulatory authority (State Institute for  
67 Drug Control) and their potential amendments will be submitted for approval.

### 68 **Trial registration number and protocol version**

69 ClinicalTrials.gov Identifier: NCT05391412  
70 EudraCT No.: 2021-005493-25. Protocol version is 1.1 of the date 28/2/2022.

### 73 **Key words**

74 scoliosis, fibrinogen, paediatrics, orthopaedic, anaesthesiology

### 76 **Strength and limitations of the study**

- 77 1. Results of this study might improve knowledge about prophylactic fibrinogen  
78 administration in the paediatric population during scoliosis surgery.
- 79 2. The results of this feasibility study will provide data to plan a fully powered  
80 randomised trial.

1  
2  
3  
4  
5  
6  
7  
8  
9  
10  
11  
12  
13  
14  
15  
16  
17  
18  
19  
20  
21  
22  
23  
24  
25  
26  
27  
28  
29  
30  
31  
32  
33  
34  
35  
36  
37  
38  
39  
40  
41  
42  
43  
44  
45  
46  
47  
48  
49  
50  
51  
52  
53  
54  
55  
56  
57  
58  
59  
60

81 3. Results of this study might support the claim about the safety of the fibrinogen  
82 administration before surgery.

---

84 4. The participants are younger than 18 years at the time of recruitment,  
85 according to national legislation, the informed consent must be signed by both  
86 parents or legal guardians.

87 5. The feasibility assessment may indicate a lack of data to determine the  
88 influence on blood loss and bleeding management.

For peer review only

## 124 **Background**

125 Scoliosis is defined as an abnormal lateral deviation of the spine of more than  
126 10° in the frontal plane, with deviation in the sagittal plane and vertebral rotation. It is  
127 one of the most common spinal deformities in children (1–3). The approach to the  
128 treatment is multidisciplinary and depends on the scoliotic curve severity and  
129 progression (4). The surgery is commonly indicated in patients with progressive  
130 curves and Cobb angle over 40° to stop further progression of the curve and prevent  
131 the development of multiple organ disease (5). Except for musculoskeletal disorders,  
132 cardiovascular, respiratory, gastrointestinal, or psychosocial problems are described  
133 in patients with scoliosis (6). Anaesthesia for scoliosis surgery is a highly challenging  
134 task for the whole team. The specifics of such anaesthesia include e.g. long  
135 operation time, body temperature decrease, high blood losses, positioning, or  
136 intraoperative neurophysiological monitoring (7,8).

137 During scoliosis surgery, high blood loss and the necessity of blood  
138 transfusions are described, while allogeneic derivatives are necessary in the  
139 perioperative period in about 30 % to 60 % of cases (9). Bleeding complications and  
140 adverse events associated with blood transfusions prolong and increase the cost of  
141 hospitalisation and increase the mortality (10). Well-known and commonly applied  
142 approaches to reduce blood loss include antifibrinolytics, such as tranexamic acid,  
143 which can be administered before surgery (11,12), permissive hypotension, which  
144 can be used to reduce blood loss. Prevention of hypothermia is another way to  
145 reduce bleeding, and cell salvage, especially in high-risk patients, where it is  
146 preferred to minimise allogeneic blood transfusions (13).

147 Fibrinogen is essential for clot formation and stopping bleeding (14,15).  
148 Hypofibrinogenemia or dysfibrinogenemia leads to more severe bleeding during  
149 high-extensive surgery (16–18). Moreover, some studies describe less blood loss in  
150 patients with higher preoperative fibrinogen levels (19). Prophylactic administration  
151 of fibrinogen is a widely discussed theme, but to date, the data are limited (20).  
152 Some studies described a significant reduction in blood loss and a secondary  
153 reduction in allogeneic derivatives administration. Prophylactic fibrinogen  
154 administration has been described in cardiovascular or urological surgery (21–23).  
155 Additionally, early administration has been reported to be safe in the paediatric  
156 population (24).

157 However, the effect of prophylactic fibrinogen administration in paediatric  
158 scoliosis surgery remains unclear. We designed this study to verify the feasibility of  
159 prophylactic fibrinogen administration in paediatric scoliosis surgery. The results will  
160 be used to plan a sufficiently large randomised trial with the aim to clarify the impact  
161 of prophylactic fibrinogen application on the magnitude of blood loss and the need  
162 for transfusion. This study is focused on the safety, efficacy, and feasibility of  
163 prophylactic administration of fibrinogen in scoliosis surgery. The clinical outcome of  
164 each participant is studied, particularly the incidence of potential adverse events  
165 such as thromboembolism, allergic reactions, or fevers. The results of this study may

1  
2  
3 166 improve knowledge about prophylactic fibrinogen application. All participants in this  
4 167 study will contribute to this socially beneficial knowledge.  
5  
6 168

## 7 169 **Methods and analysis**

8  
9 170

### 10 171 **Study design**

11 172 The setting of the study is two-arm, prospective, monocentric, randomised,  
12 173 double-blind pilot trial with a 1:1 allocation ratio testing safety, efficacy and feasibility  
13 174 of prophylactic fibrinogen administration during scoliosis surgery in the paediatric  
14 175 population. The pilot study started on 1/6/2022. The study protocol is compiled  
15 176 according to the SPIRIT (Standard Protocol Items: Recommendations for  
16 177 Interventional Trials) checklist (25).  
17  
18 178

### 19 179 **Aims and objectives**

20  
21 180 This pilot study is conducted before designing a fully powered study. It aims to  
22 181 assess the safety, feasibility, and efficacy of prophylactic fibrinogen administration  
23 182 during scoliosis surgery in the paediatric population. Results from this pilot study will  
24 183 be used to optimise the study design and power analysis to determine the sample  
25 184 size of the final study.

26 185 The primary aim of a clinical trial is to assess the safety of perioperative  
27 186 infusion of fibrinogen during scoliosis surgery in children. The incidence of any  
28 187 adverse events (AEs) and reactions will be monitored during participation in the  
29 188 study.

30 189 The secondary aim is to investigate the additional safety information,  
31 190 feasibility and efficacy of a prophylactic administration of fibrinogen. The incidence of  
32 191 adverse events and reactions according to the following Adverse Events of Special  
33 192 Interest (AESI) will be monitored. Monitored AESI include deep vein thrombosis  
34 193 verified on ultrasound imaging, pulmonary embolism confirmed on CT scan, and  
35 194 infection or healing disorder requiring re-surgery and/or the initiation of antibiotic  
36 195 therapy.

37 196 Other endpoints and monitored parameters, such as additional safety  
38 197 information, demographic characteristics, laboratory values, comparison of blood  
39 198 loss, or feasibility assessment, are mentioned in the section "Data collection."  
40  
41 199

### 42 200 **Participants**

#### 43 201 *Eligibility criteria*

44 202 All patients admitted to the hospital for scoliosis surgery will be screened for  
45 203 inclusion criteria. When inclusion criteria will be met, the exclusion criteria will be  
46 204 checked. Only patients with fulfilled all inclusion criteria and without all exclusion  
47 205 criteria will be considered for participation in the study.  
48  
49 206

#### 50 207 *Inclusion criteria are as follows:*

- 51 208 - Elective scoliosis surgery.
- 52  
53  
54  
55  
56  
57  
58  
59  
60

- 1  
2  
3 209 - Age < 18 years at the time of enrollment.  
4 210 - Signed the relevant informed consent form.  
5  
6 211 - Sexually active participants ( $\geq 15$  years old) must agree to the use of following  
7  
8 212 methods of contraception for the duration of this clinical trial:  
9  
10 213 - Women - proper use of a highly reliable method of contraception, i.e.  
11 214 combined hormonal contraception (oral, vaginal or transdermal form),  
12 215 gestagen hormonal contraceptives associated with ovulation inhibition  
13 216 (oral or injectable form) or sexual abstinence.  
14  
15 217 - Men - sexual abstinence or the use of an adequate contraceptive  
16 218 method (i.e. condom) in case of sexual intercourse.

17  
18 219 *Exclusion criteria are as follows:*

- 19 220 - Diagnosed congenital or acquired coagulopathy.  
20 221 - Use of anticoagulants with the exception of perioperative prophylactic  
21 222 administration of low-molecular-weight-heparin (LMWH) to prevent venous  
22 223 thromboembolism (VTE).  
23  
24 224 - Known hypersensitivity to the active substance or to any of the excipients of  
25 225 Investigational Medicinal Product (IMP).  
26  
27 226 - History of deep vein thrombosis or pulmonary embolism.  
28  
29 227 - Pregnancy and lactation.  
30

31 228  
32 229 **Recruitment and withdrawal**

33 230 The study is conducted at University Hospital Brno, Czech Republic, in  
34 231 cooperation with the Department of Anaesthesiology and Intensive Care Medicine  
35 232 and the Department of Orthopaedic Surgery. The study is controlled by research  
36 233 infrastructure CZECRIN. All patients eligible for the study and the patient's parents/  
37 234 legal guardians will be asked to participate in the EFISS study. The informed consent  
38 235 has to be signed by both parents or legal guardians. For patients who reach the age  
39 236 of 12 at the time of enrollment, adapted written information and an informed consent  
40 237 is prepared considering the level of knowledge and the age of patients. All  
41 238 participants or their parents / legal guardians can withdraw at any time without giving  
42 239 any reason, but they must notify the investigator.  
43  
44  
45

46 240  
47 241 **Sample size**

48 242 Since this is a pilot study, a power calculation to determine sample size is not  
49 243 required. Thirty participants (15 in both arms) were defined as a sample size  
50 244 according to standard guidelines for pilot studies (26–28). Considering a 5% dropout  
51 245 rate, 32 participants will be recruited.  
52  
53

54 246  
55 247 **Randomisation and blinding**

56 248 Patients will be randomised in a 1:1 ratio to receive fibrinogen or standard of  
57 249 care without further study medication. Randomisation will be performed electronically  
58 250 in the electronic case report form (eCRF) REDCap database by an unblinded  
59 251 person.  
60



1  
2  
3 252 The study medication will be prepared by the unblinded study nurse outside  
4 253 the operating theatre. It will be administered after induction of anaesthesia before the  
5 254 beginning of surgery under the supervision of an unblinded investigator. The study  
6 255 nurse and investigator will be unblinded for the duration of this study and will not be  
7 256 part of the operating team. The blinded operating team (orthopaedist,  
8 257 anaesthesiologist, and anaesthesiology nurse) will be outside the theatre during the  
9 258 IMP application / non-application. After IMP application/ non-application, unblinded  
10 259 study nurse and unblinded investigator will leave the operating room, and the blinded  
11 260 operating team will enter back to the theatre.

12 261 The data management group and statisticians will work with a pseudo-  
13 262 anonymised data set. Emergency unblinding before the end of the study should  
14 263 occur only in exceptional circumstances when knowledge of the actual treatment is  
15 264 necessary for further management of the patient's treatment. This activity can be  
16 265 performed directly in the REDCap electronic database. The investigator must report  
17 266 all unblindings (with reason) as they occur on the corresponding eCRF page.

18 267

## 19 268 **Intervention**

### 20 269 *Choice of comparators*

21 270 Bleeding and coagulopathy are present during scoliosis surgery, and lack of  
22 271 fibrinogen plays a crucial role in it. We decided to reduce blood loss and  
23 272 coagulopathy development, the fibrinogen will be administered preventively in the  
24 273 intervention arm. The standard of care is to wait for current blood loss or blood count  
25 274 and coagulation values during surgery before administration of blood products. This  
26 275 standard approach will be compared with the intervention.

### 27 276 *Standard of care*

28 277 All study participants will receive standard of care in blood and coagulation  
29 278 management for scoliosis surgery. Blood tests including haemoglobin (Hb),  
30 279 hematocrit (Htc), platelet count (Plt), fibrinogen level (Fbg), activated partial thrombin  
31 280 time (aPTT), prothrombin time (PT), and thrombin time (TT) will be performed before  
32 281 the surgery. Values will be checked before surgery, and in case of significant  
33 282 pathology, the blood transfusions or plasma derivatives will be administered, or the  
34 283 surgery will be delayed. Tranexamic acid will be administered to all patients before  
35 284 the skin incision in a dose of 10-15 mg/kg. The standard of care includes the  
36 285 restrictive administration of blood transfusion, plasma derivative, and fluids during  
37 286 the perioperative period. The anesthesiologist or attending physician in the ICU will  
38 287 administer fluids, blood transfusions, and derivatives depending on clinical  
39 288 judgement, blood loss, blood count, coagulation tests, and vital signs. The goals  
40 289 during bleeding are haemoglobin 7-9 g/dL, fibrinogen above 2 g/L, platelets above  
41 290  $100 \times 10^9/L$  and normalisation of coagulation status. The administration respects  
42 291 international guidelines (29).

### 43 292 *Intervention description*

44 293 Participants in the intervention group will receive the standard of care, and in  
45 294 addition, a single dose of fibrinogen prior to the skin incision. IMP is administered  
46 295 intravenously and is immediately available at a plasma concentration corresponding

296 to the dose. It is in a powder form in a vial, and it is necessary to solve this powder  
297 carefully. The reconstitution procedure should follow the instructions in the package  
298 leaflet. Patients in the intervention group will receive a single dose of IMP  
299 intravenously, 20–30 mg/kg (depending on body weight and clinical condition,  
300 according to the package leaflet). The medicinal product will be diluted in a 100 ml  
301 infusion bag and will be administered after induction to anaesthesia before surgery.  
302 The infusion rate should not exceed approximately 5 ml per minute. The IMP will be  
303 administered according to the above study blinding rules.

### 304 305 **Comparison**

306 Participants in the intervention group will receive standard of care and IMP  
307 before skin incision. Participants in the control group will receive standard of care  
308 without study medication before skin incision. The blinded operating team will  
309 manage both groups according to the standard of care after the initial  
310 intervention/non-intervention. Therefore, fibrinogen can be administered to all  
311 patients if indicated during surgery or in the postoperative period.

312 Primary and secondary outcomes will be compared between intervention and  
313 control groups to assess the potential feasibility of a large-scale study.

### 314 315 **Trial feasibility**

316 The trial feasibility assessment is one of the secondary aims of this study. We  
317 will monitor the recruitment rate of eligible patients who will be approached for  
318 consent to participate. The feasibility criterion is more than 75 % of enrolled  
319 participants. We will also evaluate the percentage of missing outcomes and clinical  
320 data. The goal is to have less than 10 % missing outcome data, including ICU and  
321 hospital length of stay (LOS) and survival, and less than 10% missing clinical data  
322 obtained from clinical medical notes and electronic patient records.

### 323 324 **Clinical outcomes**

325 The clinical outcome focuses on reducing blood loss and transfusions in  
326 paediatric patients after prophylactic fibrinogen administration during scoliosis  
327 surgery. Blood loss and plasma derivatives management will be reported for each  
328 participant. Blood count and coagulation parameters will be monitored before  
329 surgery, in the end, and 24 hours after the surgery. All parameters will be recorded in  
330 the eCRF database.

### 331 332 **Data collection**

333 During the course of the trial, subjects will be monitored during hospitalisation  
334 and after discharge. According to medical records, all data will be collected in an  
335 eCRF. Data of blood count (Hb, Hct, Plt) and coagulation status (PT, aPTT, TT, Fbg)  
336 will be filled in eCRF before surgery, after surgery, and 24 hours after surgery.  
337 Information about inclusion and exclusion criteria, informed consent, and  
338 demographic data will be obtained on the day of enrollment. Collected participant  
339 demographic data will be age (years), sex (male, female), and weight (kilograms).

340 Blood samples will be taken before surgery according to standard of care, post-  
 341 operative blood samples will be taken immediately after surgery and 24 h after  
 342 surgery. We will record blood loss, the volume of blood loss for the surgical segment  
 343 of the spine, and urinary output during surgery and 24 hours after surgery. We will  
 344 track the number, type, and volume of administered transfusion products, plasma  
 345 derivatives, crystalloid solutions, and colloid solutions during surgery and in 24 hours  
 346 postoperative period. The critical part of monitored data will be the incidence of  
 347 adverse events and reactions according to the following AESI. These reactions will  
 348 include deep-vein thrombosis verified on ultrasound imaging, pulmonary embolism  
 349 confirmed on CT, infection or healing disorder requiring re-surgery, and/or the  
 350 initiation of antibiotic therapy.

351 Other monitored additional safety information will be:

- 352 - Hospital LOS.
- 353 - Intensive care length of stay (ICU LOS) (day of admission and day of  
 354 discharge will be counted as one day).
- 355 - 28-day mortality (number of patients who are not alive 28 days after  
 356 randomization).

357 According to the SPIRIT checklist the schedule of enrollment, interventions, and  
 358 assessments is summarised in Table 1 (25).

360 **Table 1:** Clinical trial schedule

|                                                  | STUDY PERIOD  |                |                 |       |                           |               |                       |
|--------------------------------------------------|---------------|----------------|-----------------|-------|---------------------------|---------------|-----------------------|
|                                                  | Screenin<br>g | Allocatio<br>n | Post-allocation |       | Hospital<br>discharg<br>e | Follow-<br>up | Premature termination |
| TIMEPOINT                                        | $D_0$         | $D_{0-1}$      | $D_1$           | $D_2$ | $D_{3-28}$                | $D_{28}$      | Anytime               |
| <b>ENROLMENT:</b>                                |               |                |                 |       |                           |               |                       |
| Inclusion/Exclusion criteria                     | X             |                |                 |       |                           |               |                       |
| Informed consent                                 | X             |                |                 |       |                           |               |                       |
| Pregnancy testing <sup>1</sup>                   | X             |                |                 |       |                           |               |                       |
| Randomization                                    |               | X              |                 |       |                           |               |                       |
| <b>INTERVENTION:</b>                             |               |                |                 |       |                           |               |                       |
| Study medication application <sup>2</sup>        |               |                | X               |       |                           |               |                       |
| <b>ASSESSMENTS:</b>                              |               |                |                 |       |                           |               |                       |
| Demographic data <sup>3</sup>                    | X             |                |                 |       |                           |               |                       |
| Adverse events                                   |               |                | X               | X     | X                         | X             | X                     |
| Laboratory testing <sup>4</sup>                  |               |                | X               | X     |                           |               |                       |
| Blood loss <sup>5</sup>                          |               |                | X               | X     |                           |               |                       |
| Urinary output <sup>6</sup>                      |               |                | X               | X     |                           |               |                       |
| Transfusion products<br>consumption <sup>7</sup> |               |                | X               | X     |                           |               |                       |
| Fluid therapy <sup>7</sup>                       |               |                | X               | X     |                           |               |                       |
| ICU LOS (days)                                   |               |                |                 |       | X                         |               |                       |
| LOS (days)                                       |               |                |                 |       | X                         |               |                       |
| 28-day mortality                                 |               |                |                 |       |                           | X             |                       |
| Reason for premature<br>termination              |               |                |                 |       |                           |               | X                     |

361

- 1  
2  
3 362 1 urine pregnancy testing  
4 363 2 fibrinogen infusion or standard of care  
5 364 3 age, sex, weight  
6 365 4 haemoglobin, haematocrit, platelet count, fibrinogen, aPTT, PT, TT  
7 366 5 volume (ml) during surgery and in the 24-hour postoperative period and volume (ml) related to the surgical  
8 367 segment of the spine  
9 368 6 volume (ml) in the 24-hour postoperative period  
10 369 7 type and volume (ml) during surgery and in the 24-hour postoperative period  
11 370

---

11 371 All study-related information will be stored securely at the study site. All  
12 372 participant information will be stored in locked file cabinets in areas with limited  
13 373 access. All local databases will be secured with password-protected access  
14 374 systems. Forms, lists, logbooks, appointment books, and other listings that link  
15 375 participant ID numbers to additional identifying information will be stored in a locked  
16 376 file in an area with limited access. No later than 3 years after the collection of the 1-  
17 377 year post-randomization, we will deliver a completely blinded data set to an  
18 378 appropriate data repository for sharing purposes. Statistical codes will be archived in  
19 379 accordance with SOPs.  
20 380

### 21 381 **Statistical analysis**

22 382 A separate Statistical Analysis Plan (SAP) will be prepared to provide details  
23 383 on the approach to analyses. The SAP will be finalised before the database lock. All  
24 384 eventual deviations from the SAP will be described and justified in the relevant part  
25 385 of the Clinical Trial Report. As a general approach for the descriptive analysis, the  
26 386 following statistics will be provided for continuous variables: the number of subjects  
27 387 with available data (n), mean, standard deviation, median, minimum and maximum.  
28 388 The number and percentage of patients will be provided for categorical variables. For  
29 389 a comparison of continuous variables between treatment groups two-sample t-test or  
30 390 its nonparametric alternative Mann-Whitney test will be used, where appropriate.  
31 391 Pearson's chi-square test or Fisher exact test will be used to compare categorical  
32 392 variables, where appropriate. All statistical tests will be two-sided. P-values < 0.05  
33 393 will constitute statistically significant differences. During the pilot study the interim  
34 394 analysis is not planned.

35 395 Protocol non-adherence will be assessed by the principal investigator case by  
36 396 case. Patients with major deviations from the study protocol will be excluded from  
37 397 the analysis. Missing data are not planned to be imputed. However, in the event of  
38 398 substantial missing data for any parameter, a sensitivity analysis using any method  
39 399 of imputation could also be used.

### 40 400 **Patient and public involvement**

41 401 Patients or the public will not be involved in the study development. This  
42 402 EFISS study was proposed and designed by an expert team of University Hospital  
43 403 Brno and the Faculty of Medicine, Masaryk University Brno in the Czech Republic.  
44 404

### 45 405 **Monitoring and auditing**

1  
2  
3 406 The trial centre will be monitored according to the monitoring plan provided by  
4 407 research infrastructure CZECRIN. The objectives of the monitoring are to ensure that  
5 408 the trial participant's safety and rights are respected, that accurate, valid and  
6 409 complete data are collected, and that the trial is conducted in accordance with the  
7 410 trial protocol, the principles of GCP and national legislation. Sponsor, Regulatory  
8 411 authority and Ethics committees have the right to inspect/audit the trial site.  
9 412

### 12 413 **Ethics and dissemination**

14 414 This trial follows the applicable legislation and requirements for good clinical  
15 415 practice according to the ICH E6(R2). Compliance with this standard provides public  
16 416 assurance that the rights, safety, and well-being of trial participants are protected  
17 417 and that the clinical trial data are credible.

19 418 All essential trial documents were approved by the relevant ethics committee  
20 419 and national regulatory authority (State Institute for Drug Control) and their potential  
21 420 amendments will be submitted for approval. The study was approved by University  
22 421 hospital Brno's Ethics Committee (No.: 24/22MONO) and by State Institute for Drug  
23 422 Control (No.: sukls11048/2022). This clinical study includes patients belonging to the  
24 423 category of vulnerable subjects, namely children and adolescents under 18 years of  
25 424 age.

#### 28 425 *Informed consent procedure*

30 426 The parents / legal guardians will receive written information and an informed  
31 427 consent form (ICF). The investigator will inform in a comprehensible manner about  
32 428 the nature, purpose, and significance of the clinical trial simultaneously. This  
33 429 procedure will take place before enrolling the child in the study. Parents / legal  
34 430 guardians will also be informed of the measures to protect personal data. That  
35 431 liability insurance has been arranged for investigators and sponsors in the event of  
36 432 health damage due to a clinical trial, including possible compensation for trial  
37 433 subjects. Paediatric patients will receive from the investigator information on the  
38 434 clinical trial adapted to their level of knowledge and intellectual abilities, including  
39 435 details on the benefits and risks of participating in this clinical trial. The explicit wish  
40 436 of instructed paediatric patients to refuse to participate or to withdraw from a clinical  
41 437 trial at any time is always respected. Written information and an informed assent  
42 438 form are prepared for patients who reach the age of 12 at the time of enrollment.  
43 439 Paediatric patients and their parents / legal guardians will get sufficient time to study  
44 440 the written information and the informed consent form carefully and will ask  
45 441 additional questions to which the investigator must respond satisfactorily. All legal  
46 442 representatives (both parents) will must sign the informed consent form at the end of  
47 443 the process.

#### 53 444 *Supervision of the informed consent procedure*

55 445 The process of obtaining informed consent from the patient's parents / legal  
56 446 guardians, or patients, must always be adequately documented by the investigator  
57 447 using valid forms and the patient's medical records. The clinical trial monitor will  
58 448 check the process during monitoring visits. Significant deviations in the process will  
59 449 lead to the termination of the patient's participation in the trial.

1  
2  
3 450**451 Discussion**

452 Prophylactic fibrinogen administration before high-risk surgeries is a widely  
453 discussed topic across medical fields. Preoperative lower levels of fibrinogen are  
454 associated with higher blood loss in adolescent idiopathic scoliosis surgery.  
455 However, if the effect of prophylactic fibrinogen administration will lead to blood loss  
456 reduction in these patients is unclear (17,18,30).

457 The safety of fibrinogen administration in the paediatric population has been  
458 demonstrated in several studies (24,31). However, in these studies, fibrinogen was  
459 substituted during the surgery according to the viscoelastic haemostatic assays, the  
460 substitution was not prophylactic. In addition, the number of participants was low. In  
461 summary, data on prophylactic administration in children and adolescents are  
462 insufficient, more studies are needed.

463 We can see some similarity with tranexamic acid administration. In recent  
464 years, tranexamic acid has been commonly used in scoliosis surgery to reduce blood  
465 loss (32–34). The efficacy of tranexamic acid is unambiguous, it reduces blood loss,  
466 the need for blood transfusions and the length of hospitalisation (32). The use of  
467 tranexamic acid is incorporated in orthopaedic recommendations for blood  
468 management (35). However, some studies have provided evidence of the  
469 thromboembolic potential of tranexamic acid (36,37). In contrast, fibrinogen is not  
470 associated with higher thromboembolic risk repeatedly (38). It is appropriate to study  
471 fibrinogen concentrate to see if it has the same positive properties as tranexamic  
472 acid without possible side effects.

473 This pilot study also has some limitations. The sample size is designed  
474 according to standard guidelines for pilot studies, so it is limited to 32 patients.  
475 Participants are under the age of 18, so informed consent has to be signed by both  
476 parents or legal guardians, which may lead to limited enrollment. Data are collected  
477 28 days after randomisation, which may not be an adequate interval to evaluate  
478 safety and feasibility. And final limitation is the absence of placebo administration in  
479 the standard of care group. This absence is mainly caused by the requirements of  
480 the national regulatory authority, which does not allow the administration of a  
481 placebo without a therapeutic or preventive effect in the paediatric population.

482

**483 Conclusion**

484 This pilot study should demonstrate the safety and feasibility of the intended  
485 intervention and form the basis for a later large study which could have extensive  
486 impact in scoliosis surgery and bleeding management. But the results will not prove  
487 most likely the efficacy of prophylactic administration of fibrinogen in scoliosis  
488 surgery.

489

490

491

**492 Acknowledgements**

1  
2  
3 493 The authors thank everyone involved in the study, concretely the participants,  
4 494 assessors and all health care providers taking care for participants.  
5 495

## 6 496 **Contributions**

7  
8 497 OH, RG first conceived this protocol after revision from the other authors. KV,  
9 498 JH, MG are the main authors and editors of this manuscript. MG, MR are responsible  
10 499 for patient involvement. JH, KV, HH provide standards of care. CZECRIN (MK, RD)  
11 500 assisted in the development of the study protocol and is responsible for statistical  
12 501 analysis. All authors read and approved the final version of the manuscript.  
13 502

## 14 503 **Sponsor**

15 504 Name and contact information for the trial sponsor:

16 505 Trial Sponsor: Masaryk University Brno

17 506 Contact name: prof. Martin Smrcka, MD, PhD, MBA

18 507 Address: Jihlavská 20, 602 00 Brno

19 508 Telephone: +420532232884

20 509 Email: [smrcka.martin@fnbrno.cz](mailto:smrcka.martin@fnbrno.cz)

21 510  
22 511 The sponsor has no role in the design of this trial and will not have any role during its  
23 512 execution, analyses, interpretation of the data, or the decision to submit results.  
24 513

## 25 514 **Funding**

26 515 The project was supported by Specific University Research provided by MSMT  
27 516 (MUNI/A/1336/2022) and by the Ministry of Health, Czech Republic - conceptual  
28 517 development of research organisation (FNBr, 65269705). The project was supported  
29 518 by the national budget through MEYS, RI CZECRIN (LM2018128).  
30 519

## 31 520 **Conflict of interest**

32 521 In the past 5 years, KV and RG have received honoraria for lecturing from  
33 522 CSL Behring.  
34 523

## 35 524 **Plan**

36 525 We intend to submit the results of the study to be published in a peer-reviewed  
37 526 international medical journal. The author team will not change.  
38 527  
39 528  
40 529  
41 529  
42 529  
43 529  
44 529  
45 529  
46 529  
47 529  
48 529  
49 529  
50 529  
51 529  
52 529  
53 529  
54 529  
55 529  
56 529  
57 529  
58 529  
59 529  
60 529

1  
2  
3 530  
4  
5 531  
6  
7  
8 532  
9  
10 533  
11  
12  
13 534  
14 535  
15 536  
16 537  
17 538  
18  
19 539  
20 540  
21 541  
22  
23 542  
24 543  
25 544  
26 545  
27 546  
28 547  
29 548  
30 549  
31 550  
32 551  
33 552  
34 553  
35 554  
36 555  
37 556  
38 557  
39 558  
40 559  
41 560  
42 561  
43 562  
44 563  
45 564

## References

1. El-Hawary R, Chukwunyerena C. Update on evaluation and treatment of scoliosis. *Pediatr Clin North Am*. 2014 ;61(6):1223–41. Available from: <https://pubmed.ncbi.nlm.nih.gov/25439021/>
2. Kim HJ, Blanco JS, Widmann RF. Update on the management of idiopathic scoliosis. *Curr Opin Pediatr*. 2009 Feb;21(1):55–64. Available from: <https://pubmed.ncbi.nlm.nih.gov/19242241/>
3. Konieczny MR, Senyurt H, Krauspe R. Epidemiology of adolescent idiopathic scoliosis. *J Child Orthop*. 2013 Feb 1;7(1):3–9. Available from: <https://pubmed.ncbi.nlm.nih.gov/24432052/>
4. Blevins K, Battenberg A, Beck A. Management of Scoliosis. *Adv Pediatr*. 2018 Aug 1;65(1):249–66. Available from: <https://pubmed.ncbi.nlm.nih.gov/30053928/>
5. Parr A, Askin G. Paediatric scoliosis: Update on assessment and treatment. *Aust J Gen Pract*. 2020 Dec 1;49(12):832–7. Available from: <https://pubmed.ncbi.nlm.nih.gov/33254215/>
6. Sheehan DD, Grayhack J. Pulmonary Implications of Pediatric Spinal Deformities. *Pediatr Clin North Am*. 2021 Feb 1;68(1):239–59. Available from: <https://pubmed.ncbi.nlm.nih.gov/33228935/>
7. Weissmann KA, Lafage V, Pitaque CB, Lafage R, Huaiquilaf CM, Ang B, et al. Neuromuscular Scoliosis: Comorbidities and Complications. *Asian Spine J*. 2021;15(6):778–90. Available from: <https://pubmed.ncbi.nlm.nih.gov/33355852/>
8. Gibson PRJ. Anaesthesia for correction of scoliosis in children. *Anaesth Intensive Care*. 2004;32(4):548–59. Available from: <https://pubmed.ncbi.nlm.nih.gov/15675216/>
9. Chen W, Shen J, Zhang Y, Hu A, Liang J, Ma L, et al. A randomised controlled trial of fibrinogen concentrate during scoliosis surgery. *Anaesthesia*. 2020 Nov 1; 75(11):1476–81. Available from: <https://pubmed.ncbi.nlm.nih.gov/32500569/>
10. Lavoie J. Blood transfusion risks and alternative strategies in pediatric patients. *Paediatr Anaesth*. 2011 Jan;21(1):14–24. Available from: <https://pubmed.ncbi.nlm.nih.gov/21155923/>



- 1  
2  
3 565 11. Wang M, Zheng XF, Jiang LS. Efficacy and Safety of Antifibrinolytic Agents in  
4 566 Reducing Perioperative Blood Loss and Transfusion Requirements in Scoliosis  
5 567 Surgery: A Systematic Review and Meta-Analysis. PLoS One. 2015 Sep 18;10(9).  
6 568 Available from: <https://pubmed.ncbi.nlm.nih.gov/26382761/>  
7  
8  
9 569 12. McNicol ED, Tzortzopoulou A, Schumann R, Carr DB, Kalra A. Antifibrinolytic  
10 570 agents for reducing blood loss in scoliosis surgery in children. Cochrane Database  
11 571 Syst Rev. 2016 Sep 19;9(9):CD006883. Available from:  
12 572 <https://pubmed.ncbi.nlm.nih.gov/27643712/>  
13  
14  
15 573 13. Klein AA, Bailey CR, Charlton AJ, Evans E, Guckian-Fisher M, McCrossan R, et  
16 574 al. Association of Anaesthetists guidelines: cell salvage for peri-operative blood  
17 575 conservation 2018. Anaesthesia. 2018 Sep 1;73(9):1141–50. Available from:  
18 576 <https://pubmed.ncbi.nlm.nih.gov/29989144/>  
19  
20  
21 577 14. May JE, Wolberg AS, Lim MY. Disorders of Fibrinogen and Fibrinolysis. Hematol  
22 578 Oncol Clin North Am . 2021 Dec 1;35(6):1197–217. Available from:  
23 579 <https://pubmed.ncbi.nlm.nih.gov/34404562/>  
24  
25  
26 580 15. Kattula S, Byrnes JR, Wolberg AS. Fibrinogen and Fibrin in Hemostasis and  
27 581 Thrombosis. Arterioscler Thromb Vasc Biol . 2017 Mar 1;37(3):e13–21. Available  
28 582 from: <https://pubmed.ncbi.nlm.nih.gov/28228446/>  
29  
30  
31 583 16. Naik BI, Pajewski TN, Bogdonoff DL, Zuo Z, Clark P, Terkawi AS, et al.  
32 584 Rotational thromboelastometry-guided blood product management in major spine  
33 585 surgery. J Neurosurg Spine. 2015 Aug 1;23(2):239–49. Available from:  
34 586 <https://pubmed.ncbi.nlm.nih.gov/26053893/>  
35  
36  
37 587 17. Geck MJ, Singh D, Gunn H, Stokes JK, Truumees E. Is Preoperative Fibrinogen  
38 588 Testing Associated With Total Blood Loss in Adolescent Idiopathic Scoliosis  
39 589 Correction? Spine Deform. 2017 Nov 1;5(6):381–6. Available from:  
40 590 <https://pubmed.ncbi.nlm.nih.gov/29050713/>  
41  
42  
43 591 18. Geck MJ, Singh D, Gunn H, Stokes JK, Truumees E. Relationship Between  
44 592 Preoperative Plasma Fibrinogen Concentration, Perioperative Bleeding, and  
45 593 Transfusions in Elective Adult Spinal Deformity Correction. Spine Deform. 2019 Sep  
46 594 1;7(5):788–95. Available from: <https://pubmed.ncbi.nlm.nih.gov/31495480/>  
47  
48  
49 595 19. Carling MS, Jeppsson A, Wessberg P, Henriksson A, Baghaei F, Brisby H.  
50 596 Preoperative fibrinogen plasma concentration is associated with perioperative  
51 597 bleeding and transfusion requirements in scoliosis surgery. Spine (Phila Pa 1976).  
52 598 2011 Apr 1;36(7):549–55. Available from:  
53 599 <https://pubmed.ncbi.nlm.nih.gov/21079540/>  
54  
55  
56  
57 600 20. Grottke O, Schöchl H, Levy JH, Hunt BJ. Supplementary fibrinogen in the  
58 601 management of bleeding: re-evaluation of data from clinical trials. Br J Anaesth.

- 1  
2  
3 602 2018 Feb 1;120(2):407–9. Available from:  
4 603 <https://pubmed.ncbi.nlm.nih.gov/29406192/>  
5  
6  
7 604 21. Ranucci M, Baryshnikova E, Crapelli GB, Rahe-Meyer N, Menicanti L, Frigiola A,  
8 605 et al. Randomized, double-blinded, placebo-controlled trial of fibrinogen concentrate  
9 606 supplementation after complex cardiac surgery. *J Am Heart Assoc.* 2015;4(6).  
10 607 Available from: <https://pubmed.ncbi.nlm.nih.gov/26037084/>  
11  
12  
13 608 22. Soleimani M, Masoumi N, Nooraei N, Lashay A, Safarinejad MR. The effect of  
14 609 fibrinogen concentrate on perioperative bleeding in transurethral resection of the  
15 610 prostate: a double-blind placebo-controlled and randomized study. *J Thromb*  
16 611 *Haemost.* 2017 Feb 1;15(2):255–62. Available from:  
17 612 <https://pubmed.ncbi.nlm.nih.gov/27888575/>  
18  
19  
20 613 23. Fathi M, Lashay A, Massoudi N, Nooraei N, Nik MA. Fibrinogen prophylaxis for  
21 614 reducing perioperative bleeding in patients undergoing radical cystectomy: A double-  
22 615 blind placebo-controlled randomized trial. *J Clin Anesth.* 2021 Oct 1;73. Available  
23 616 from: <https://pubmed.ncbi.nlm.nih.gov/34098395/>  
24  
25  
26 617 24. Haas T, Spielmann N, Restin T, Seifert B, Henze G, Obwegeser J, et al. Higher  
27 618 fibrinogen concentrations for reduction of transfusion requirements during major  
28 619 paediatric surgery: A prospective randomised controlled trial. *Br J Anaesth.* 2015  
29 620 Aug 1;115(2):234–43. Available from: <https://pubmed.ncbi.nlm.nih.gov/25982134/>  
30  
31  
32 621 25. Chan AW, Tetzlaff JM, Altman DG, Laupacis A, Gøtzsche PC, Krleža-Jerić K, et  
33 622 al. SPIRIT 2013 statement: defining standard protocol items for clinical trials. *Ann*  
34 623 *Intern Med.* 2013 Feb 5;158(3):200–7. Available from:  
35 624 <https://pubmed.ncbi.nlm.nih.gov/23295957/>  
36  
37  
38 625 26. Hertzog MA. Considerations in determining sample size for pilot studies. *Res*  
39 626 *Nurs Health.* 2008 Apr;31(2):180–91. Available from:  
40 627 <https://pubmed.ncbi.nlm.nih.gov/18183564/>  
41  
42  
43 628 27. Thabane L, Ma J, Chu R, Cheng J, Ismaila A, Rios LP, et al. A tutorial on pilot  
44 629 studies: the what, why and how. *BMC Med Res Methodol.* 2010;10. Available from:  
45 630 <https://pubmed.ncbi.nlm.nih.gov/20053272/>  
46  
47  
48 631 28. Lancaster GA, Dodd S, Williamson PR. Design and analysis of pilot studies:  
49 632 recommendations for good practice. *J Eval Clin Pract.* 2004 May;10(2):307–12.  
50 633 Available from: <https://pubmed.ncbi.nlm.nih.gov/15189396/>  
51  
52  
53 634 29. Kozek-Langenecker SA, Ahmed AB, Afshari A, Albaladejo P, Aldecoa C,  
54 635 Barauskas G, et al. Management of severe perioperative bleeding: guidelines from  
55 636 the European Society of Anaesthesiology: First update 2016. *Eur J Anaesthesiol.*  
56 637 2017 Jun 1;34(6):332–95. Available from:  
57 638 <https://pubmed.ncbi.nlm.nih.gov/28459785/>  
58  
59  
60

639

30. Carling MS, Zarhoud J, Jeppsson A, Eriksson BI, Brisby H. Preoperative plasma fibrinogen concentration, factor XIII activity, perioperative bleeding, and transfusions in elective orthopaedic surgery: A prospective observational study. *Thromb Res*. 2016 Mar 1;139:142–7. Available from: <https://pubmed.ncbi.nlm.nih.gov/26916312/>

31. Haas T, Goobie S, Spielmann N, Weiss M, Schmutz M. Improvements in patient blood management for pediatric craniostomy surgery using a ROTEM(®)-assisted strategy - feasibility and costs. *Paediatr Anaesth*. 2014;24(7):774–80. Available from: <https://pubmed.ncbi.nlm.nih.gov/24417649/>

32. Goobie SM, Zurakowski D, Glotzbecker MP, McCann ME, Hedequist D, Brustowicz RM, et al. Tranexamic Acid Is Efficacious at Decreasing the Rate of Blood Loss in Adolescent Scoliosis Surgery: A Randomized Placebo-Controlled Trial. *J Bone Joint Surg Am*. 2018;100(23):2024–32. Available from: <https://pubmed.ncbi.nlm.nih.gov/30516625/>

33. Shrestha IK, Ruan TY, Lin L, Tan M, Na XQ, Qu QC, et al. The efficacy and safety of high-dose tranexamic acid in adolescent idiopathic scoliosis: a meta-analysis. *J Orthop Surg Res*. 2021 Dec 1;16(1):1–9. Available from: <https://pubmed.ncbi.nlm.nih.gov/33446219/>

34. Hasan MS, Yunus SN, Ng CC, Chan CYW, Chiu CK, Kwan MK. Tranexamic Acid in Pediatric Scoliosis Surgery: A Prospective Randomized Trial Comparing High-dose and Low-dose Tranexamic Acid in Adolescent Idiopathic Scoliosis Undergoing Posterior Spinal Fusion Surgery. *Spine (Phila Pa 1976)*. 2021 Nov 15;46(22):E1170–7. Available from: <https://pubmed.ncbi.nlm.nih.gov/33882541/>

35. Palmer AJR, Gagné S, Fergusson DA, Murphy MF, Grammatopoulos G. Blood Management for Elective Orthopaedic Surgery. *J Bone Joint Surg Am*. 2020 Sep 2;102(17):1552–64. Available from: <https://pubmed.ncbi.nlm.nih.gov/32558663/>

36. Myers SP, Kutcher ME, Rosengart MR, Sperry JL, Peitzman AB, Brown JB, et al. Tranexamic acid administration is associated with an increased risk of posttraumatic venous thromboembolism. *Journal of Trauma and Acute Care Surgery*. 2019 Jan 1;86(1):20–7. Available from: <https://pubmed.ncbi.nlm.nih.gov/30239375/>

37. Roberts I, Shakur-Still H, Afolabi A, Akere A, Arribas M, Brenner A, et al. Effects of a high-dose 24-h infusion of tranexamic acid on death and thromboembolic events in patients with acute gastrointestinal bleeding (HALT-IT): an international randomised, double-blind, placebo-controlled trial. *Lancet*. 2020 Jun 20;395(10241):1927–36. Available from: <https://pubmed.ncbi.nlm.nih.gov/32563378/>

38. Ng KT, Yap JLL, Kwok PE. The effect of fibrinogen concentrate on postoperative blood loss: A systematic review and meta-analysis of randomized controlled trials. *J*

1  
2  
3 676 Clin Anesth. 2020 Aug 1;63. Available from:  
4 677 <https://pubmed.ncbi.nlm.nih.gov/32193125/>  
5  
6

7 678

8 679  
9  
10  
11  
12  
13  
14  
15  
16  
17  
18  
19  
20  
21  
22  
23  
24  
25  
26  
27  
28  
29  
30  
31  
32  
33  
34  
35  
36  
37  
38  
39  
40  
41  
42  
43  
44  
45  
46  
47  
48  
49  
50  
51  
52  
53  
54  
55  
56  
57  
58  
59  
60

For peer review only

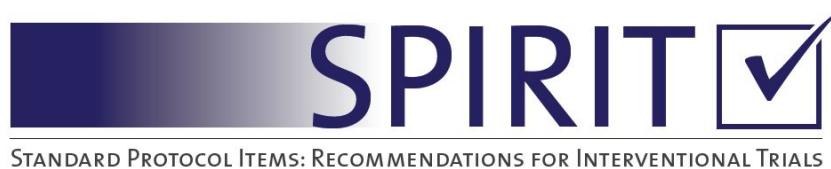

STANDARD PROTOCOL ITEMS: RECOMMENDATIONS FOR INTERVENTIONAL TRIALS

SPIRIT 2013 Checklist: Recommended items to address in a clinical trial protocol and related documents\*

| Section/item                      | Item No | Description                                                                                                                                                                                                                                                                                                       |
|-----------------------------------|---------|-------------------------------------------------------------------------------------------------------------------------------------------------------------------------------------------------------------------------------------------------------------------------------------------------------------------|
| <b>Administrative information</b> |         |                                                                                                                                                                                                                                                                                                                   |
| Title                             | 1       | Descriptive title identifying the study design, population, interventions, and, if applicable, trial acronym – <i>lines 1-2</i>                                                                                                                                                                                   |
| Trial registration                | 2a      | Trial identifier and registry name. If not yet registered, name of intended registry – <i>lines 68-70</i>                                                                                                                                                                                                         |
|                                   | 2b      | All items from the World Health Organization Trial Registration Data Set - <i>lines 68-69</i>                                                                                                                                                                                                                     |
| Protocol version                  | 3       | Date and version identifier – <i>line 70</i>                                                                                                                                                                                                                                                                      |
| Funding                           | 4       | Sources and types of financial, material, and other support <i>lines 500 - 504</i>                                                                                                                                                                                                                                |
| Roles and responsibilities        | 5a      | Names, affiliations, and roles of protocol contributors – <i>lines 4 – 13 and 482 - 487</i>                                                                                                                                                                                                                       |
|                                   | 5b      | Name and contact information for the trial sponsor – <i>lines 489 - 495</i>                                                                                                                                                                                                                                       |
|                                   | 5c      | Role of study sponsor and funders, if any, in study design; collection, management, analysis, and interpretation of data; writing of the report; and the decision to submit the report for publication, including whether they will have ultimate authority over any of these activities - <i>lines 497 - 498</i> |
|                                   | 5d      | Composition, roles, and responsibilities of the coordinating centre, steering committee, endpoint adjudication committee, data management team, and other individuals or groups overseeing the trial, if applicable (see Item 21a for data monitoring committee) <i>lines 392 - 398</i>                           |
| <b>Introduction</b>               |         |                                                                                                                                                                                                                                                                                                                   |
| Background and rationale          | 6a      | Description of research question and justification for undertaking the trial, including summary of relevant studies (published and unpublished) examining benefits and harms for each intervention - <i>lines 137 - 167</i>                                                                                       |
|                                   | 6b      | Explanation for choice of comparators - <i>lines 305 – 313</i>                                                                                                                                                                                                                                                    |
| Objectives                        | 7       | Specific objectives or hypotheses - <i>lines 179 - 198</i>                                                                                                                                                                                                                                                        |

|    |                                                                     |     |                                                                                                                                                                                                                                                                                                                                                                                                                    |
|----|---------------------------------------------------------------------|-----|--------------------------------------------------------------------------------------------------------------------------------------------------------------------------------------------------------------------------------------------------------------------------------------------------------------------------------------------------------------------------------------------------------------------|
| 1  |                                                                     |     |                                                                                                                                                                                                                                                                                                                                                                                                                    |
| 2  | Trial design                                                        | 8   | Description of trial design including type of trial (eg, parallel group, crossover, factorial, single group), allocation ratio, and framework (eg, superiority, equivalence, noninferiority, exploratory) - <i>lines 171 - 177</i>                                                                                                                                                                                 |
| 3  |                                                                     |     |                                                                                                                                                                                                                                                                                                                                                                                                                    |
| 4  |                                                                     |     |                                                                                                                                                                                                                                                                                                                                                                                                                    |
| 5  |                                                                     |     |                                                                                                                                                                                                                                                                                                                                                                                                                    |
| 6  |                                                                     |     |                                                                                                                                                                                                                                                                                                                                                                                                                    |
| 7  |                                                                     |     |                                                                                                                                                                                                                                                                                                                                                                                                                    |
| 8  | <b>Methods: Participants, interventions, and outcomes</b>           |     |                                                                                                                                                                                                                                                                                                                                                                                                                    |
| 9  |                                                                     |     |                                                                                                                                                                                                                                                                                                                                                                                                                    |
| 10 | Study setting                                                       | 9   | Description of study settings (eg, community clinic, academic hospital) and list of countries where data will be collected. Reference to where list of study sites can be obtained – <i>lines 172 - 173, 492 - 496</i>                                                                                                                                                                                             |
| 11 |                                                                     |     |                                                                                                                                                                                                                                                                                                                                                                                                                    |
| 12 |                                                                     |     |                                                                                                                                                                                                                                                                                                                                                                                                                    |
| 13 |                                                                     |     |                                                                                                                                                                                                                                                                                                                                                                                                                    |
| 14 | Eligibility criteria                                                | 10  | Inclusion and exclusion criteria for participants. If applicable, eligibility criteria for study centres and individuals who will perform the interventions (eg, surgeons, psychotherapists) - <i>lines 200 - 227</i>                                                                                                                                                                                              |
| 15 |                                                                     |     |                                                                                                                                                                                                                                                                                                                                                                                                                    |
| 16 |                                                                     |     |                                                                                                                                                                                                                                                                                                                                                                                                                    |
| 17 |                                                                     |     |                                                                                                                                                                                                                                                                                                                                                                                                                    |
| 18 |                                                                     |     |                                                                                                                                                                                                                                                                                                                                                                                                                    |
| 19 | Interventions                                                       | 11a | Interventions for each group with sufficient detail to allow replication, including how and when they will be administered – <i>lines 268 - 303</i>                                                                                                                                                                                                                                                                |
| 20 |                                                                     |     |                                                                                                                                                                                                                                                                                                                                                                                                                    |
| 21 |                                                                     |     |                                                                                                                                                                                                                                                                                                                                                                                                                    |
| 22 |                                                                     | 11b | Criteria for discontinuing or modifying allocated interventions for a given trial participant (eg, drug dose change in response to harms, participant request, or improving/worsening disease) – <i>line 186 – 195, 237 – 239, 383 – 387</i>                                                                                                                                                                       |
| 23 |                                                                     |     |                                                                                                                                                                                                                                                                                                                                                                                                                    |
| 24 |                                                                     |     |                                                                                                                                                                                                                                                                                                                                                                                                                    |
| 25 |                                                                     |     |                                                                                                                                                                                                                                                                                                                                                                                                                    |
| 26 |                                                                     |     |                                                                                                                                                                                                                                                                                                                                                                                                                    |
| 27 |                                                                     |     |                                                                                                                                                                                                                                                                                                                                                                                                                    |
| 28 |                                                                     | 11c | Strategies to improve adherence to intervention protocols, and any procedures for monitoring adherence (eg, drug tablet return, laboratory tests) – <i>N/A</i>                                                                                                                                                                                                                                                     |
| 29 |                                                                     |     |                                                                                                                                                                                                                                                                                                                                                                                                                    |
| 30 |                                                                     |     |                                                                                                                                                                                                                                                                                                                                                                                                                    |
| 31 |                                                                     |     |                                                                                                                                                                                                                                                                                                                                                                                                                    |
| 32 |                                                                     | 11d | Relevant concomitant care and interventions that are permitted or prohibited during the trial – <i>lines 276 - 291</i>                                                                                                                                                                                                                                                                                             |
| 33 |                                                                     |     |                                                                                                                                                                                                                                                                                                                                                                                                                    |
| 34 |                                                                     |     |                                                                                                                                                                                                                                                                                                                                                                                                                    |
| 35 | Outcomes                                                            | 12  | Primary, secondary, and other outcomes, including the specific measurement variable (eg, systolic blood pressure), analysis metric (eg, change from baseline, final value, time to event), method of aggregation (eg, median, proportion), and time point for each outcome. Explanation of the clinical relevance of chosen efficacy and harm outcomes is strongly recommended - <i>lines 179 – 198, 324 - 367</i> |
| 36 |                                                                     |     |                                                                                                                                                                                                                                                                                                                                                                                                                    |
| 37 |                                                                     |     |                                                                                                                                                                                                                                                                                                                                                                                                                    |
| 38 |                                                                     |     |                                                                                                                                                                                                                                                                                                                                                                                                                    |
| 39 |                                                                     |     |                                                                                                                                                                                                                                                                                                                                                                                                                    |
| 40 |                                                                     |     |                                                                                                                                                                                                                                                                                                                                                                                                                    |
| 41 |                                                                     |     |                                                                                                                                                                                                                                                                                                                                                                                                                    |
| 42 |                                                                     |     |                                                                                                                                                                                                                                                                                                                                                                                                                    |
| 43 | Participant timeline                                                | 13  | Time schedule of enrolment, interventions (including any run-ins and washouts), assessments, and visits for participants. A schematic diagram is highly recommended (see Figure) – <i>Figure 1</i> .                                                                                                                                                                                                               |
| 44 |                                                                     |     |                                                                                                                                                                                                                                                                                                                                                                                                                    |
| 45 |                                                                     |     |                                                                                                                                                                                                                                                                                                                                                                                                                    |
| 46 |                                                                     |     |                                                                                                                                                                                                                                                                                                                                                                                                                    |
| 47 |                                                                     |     |                                                                                                                                                                                                                                                                                                                                                                                                                    |
| 48 | Sample size                                                         | 14  | Estimated number of participants needed to achieve study objectives and how it was determined, including clinical and statistical assumptions supporting any sample size calculations – <i>lines 241 - 245</i>                                                                                                                                                                                                     |
| 49 |                                                                     |     |                                                                                                                                                                                                                                                                                                                                                                                                                    |
| 50 |                                                                     |     |                                                                                                                                                                                                                                                                                                                                                                                                                    |
| 51 |                                                                     |     |                                                                                                                                                                                                                                                                                                                                                                                                                    |
| 52 |                                                                     |     |                                                                                                                                                                                                                                                                                                                                                                                                                    |
| 53 |                                                                     |     |                                                                                                                                                                                                                                                                                                                                                                                                                    |
| 54 | Recruitment                                                         | 15  | Strategies for achieving adequate participant enrolment to reach target sample size – <i>229 – 234</i>                                                                                                                                                                                                                                                                                                             |
| 55 |                                                                     |     |                                                                                                                                                                                                                                                                                                                                                                                                                    |
| 56 |                                                                     |     |                                                                                                                                                                                                                                                                                                                                                                                                                    |
| 57 | <b>Methods: Assignment of interventions (for controlled trials)</b> |     |                                                                                                                                                                                                                                                                                                                                                                                                                    |
| 58 |                                                                     |     |                                                                                                                                                                                                                                                                                                                                                                                                                    |
| 59 | Allocation:                                                         |     |                                                                                                                                                                                                                                                                                                                                                                                                                    |
| 60 |                                                                     |     |                                                                                                                                                                                                                                                                                                                                                                                                                    |

|    |                |     |                                                                                 |
|----|----------------|-----|---------------------------------------------------------------------------------|
| 1  |                |     |                                                                                 |
| 2  | Sequence       | 16a | Method of generating the allocation sequence (eg, computer-                     |
| 3  | generation     |     | generated random numbers), and list of any factors for stratification.          |
| 4  |                |     | To reduce predictability of a random sequence, details of any planned           |
| 5  |                |     | restriction (eg, blocking) should be provided in a separate document            |
| 6  |                |     | that is unavailable to those who enrol participants or assign                   |
| 7  |                |     | interventions – <i>lines 247 - 251</i>                                          |
| 8  |                |     |                                                                                 |
| 9  |                |     |                                                                                 |
| 10 | Allocation     | 16b | Mechanism of implementing the allocation sequence (eg, central                  |
| 11 | concealment    |     | telephone; sequentially numbered, opaque, sealed envelopes),                    |
| 12 | mechanism      |     | describing any steps to conceal the sequence until interventions are            |
| 13 |                |     | assigned – <i>lines 249 - 251</i>                                               |
| 14 |                |     |                                                                                 |
| 15 | Implementation | 16c | Who will generate the allocation sequence, who will enrol participants,         |
| 16 |                |     | and who will assign participants to interventions - <i>lines 230 – 239, 249</i> |
| 17 |                |     | - <i>251</i>                                                                    |
| 18 |                |     |                                                                                 |
| 19 |                |     |                                                                                 |
| 20 | Blinding       | 17a | Who will be blinded after assignment to interventions (eg, trial                |
| 21 | (masking)      |     | participants, care providers, outcome assessors, data analysts), and            |
| 22 |                |     | how - <i>lines 248 - 260</i>                                                    |
| 23 |                |     |                                                                                 |
| 24 |                |     |                                                                                 |
| 25 |                | 17b | If blinded, circumstances under which unblinding is permissible, and            |
| 26 |                |     | procedure for revealing a participant's allocated intervention during           |
| 27 |                |     | the trial – <i>lines 261 - 266</i>                                              |
| 28 |                |     |                                                                                 |

### Methods: Data collection, management, and analysis

|    |                 |     |                                                                                 |
|----|-----------------|-----|---------------------------------------------------------------------------------|
| 29 |                 |     |                                                                                 |
| 30 |                 |     |                                                                                 |
| 31 | Data collection | 18a | Plans for assessment and collection of outcome, baseline, and other             |
| 32 | methods         |     | trial data, including any related processes to promote data quality (eg,        |
| 33 |                 |     | duplicate measurements, training of assessors) and a description of             |
| 34 |                 |     | study instruments (eg, questionnaires, laboratory tests) along with             |
| 35 |                 |     | their reliability and validity, if known. Reference to where data               |
| 36 |                 |     | collection forms can be found, if not in the protocol – <i>lines 332 – 367,</i> |
| 37 |                 |     | <i>Figure 1</i>                                                                 |
| 38 |                 |     |                                                                                 |
| 39 |                 |     |                                                                                 |
| 40 |                 | 18b | Plans to promote participant retention and complete follow-up,                  |
| 41 |                 |     | including list of any outcome data to be collected for participants who         |
| 42 |                 |     | discontinue or deviate from intervention protocols – <i>N/A – pilot study</i>   |
| 43 |                 |     |                                                                                 |
| 44 |                 |     |                                                                                 |
| 45 | Data            | 19  | Plans for data entry, coding, security, and storage, including any              |
| 46 | management      |     | related processes to promote data quality (eg, double data entry;               |
| 47 |                 |     | range checks for data values). Reference to where details of data               |
| 48 |                 |     | management procedures can be found, if not in the protocol – <i>lines</i>       |
| 49 |                 |     | <i>333 – 335, 359 - 367</i>                                                     |
| 50 |                 |     |                                                                                 |
| 51 |                 |     |                                                                                 |
| 52 | Statistical     | 20a | Statistical methods for analysing primary and secondary outcomes.               |
| 53 | methods         |     | Reference to where other details of the statistical analysis plan can be        |
| 54 |                 |     | found, if not in the protocol – <i>lines 369 - 382</i>                          |
| 55 |                 |     |                                                                                 |
| 56 |                 | 20b | Methods for any additional analyses (eg, subgroup and adjusted                  |
| 57 |                 |     | analyses) – <i>lines 369 - 382</i>                                              |
| 58 |                 |     |                                                                                 |
| 59 |                 |     |                                                                                 |
| 60 |                 |     |                                                                                 |

1  
2  
3  
4  
5  
6  
7  
8  
9  
10  
11  
12  
13  
14  
15  
16  
17  
18  
19  
20  
21  
22  
23  
24  
25  
26  
27  
28  
29  
30  
31  
32  
33  
34  
35  
36  
37  
38  
39  
40  
41  
42  
43  
44  
45  
46  
47  
48  
49  
50  
51  
52  
53  
54  
55  
56  
57  
58  
59  
60

20c Definition of analysis population relating to protocol non-adherence (eg, as randomised analysis), and any statistical methods to handle missing data (eg, multiple imputation) – *lines 383 - 387*

### Methods: Monitoring

- Data monitoring 21a Composition of data monitoring committee (DMC); summary of its role and reporting structure; statement of whether it is independent from the sponsor and competing interests; and reference to where further details about its charter can be found, if not in the protocol. Alternatively, an explanation of why a DMC is not needed – *lines 393 - 399*
- 21b Description of any interim analyses and stopping guidelines, including who will have access to these interim results and make the final decision to terminate the trial – *N/A– interim analysis is not planned*
- Harms 22 Plans for collecting, assessing, reporting, and managing solicited and spontaneously reported adverse events and other unintended effects of trial interventions or trial conduct – *lines 185 – 195, 346 – 350*
- Auditing 23 Frequency and procedures for auditing trial conduct, if any, and whether the process will be independent from investigators and the sponsor – *lines 393 - 399*

### Ethics and dissemination

- Research ethics approval 24 Plans for seeking research ethics committee/institutional review board (REC/IRB) approval – *lines 408 – 410*
- Protocol amendments 25 Plans for communicating important protocol modifications (eg, changes to eligibility criteria, outcomes, analyses) to relevant parties (eg, investigators, REC/IRBs, trial participants, trial registries, journals, regulators) – *N/A – pilot study*
- Consent or assent 26a Who will obtain informed consent or assent from potential trial participants or authorised surrogates, and how (see Item 32) – *lines 413 - 431*
- 26b Additional consent provisions for collection and use of participant data and biological specimens in ancillary studies, if applicable – *N/A*
- Confidentiality 27 How personal information about potential and enrolled participants will be collected, shared, and maintained in order to protect confidentiality before, during, and after the trial – *lines 359 – 367*
- Declaration of interests 28 Financial and other competing interests for principal investigators for the overall trial and each study site – *lines 499 – 500, 508 – 510*
- Access to data 29 Statement of who will have access to the final trial dataset, and disclosure of contractual agreements that limit such access for investigators – *lines 359 – 364*



|    |                   |     |                                                                              |
|----|-------------------|-----|------------------------------------------------------------------------------|
| 1  |                   |     |                                                                              |
| 2  | Ancillary and     | 30  | Provisions, if any, for ancillary and post-trial care, and for               |
| 3  | post-trial care   |     | compensation to those who suffer harm from trial participation – <i>N/A</i>  |
| 4  |                   |     |                                                                              |
| 5  | Dissemination     | 31a | Plans for investigators and sponsor to communicate trial results to          |
| 6  | policy            |     | participants, healthcare professionals, the public, and other relevant       |
| 7  |                   |     | groups (eg, via publication, reporting in results databases, or other        |
| 8  |                   |     | data sharing arrangements), including any publication restrictions –         |
| 9  |                   |     | <i>lines 512 – 514</i>                                                       |
| 10 |                   |     |                                                                              |
| 11 |                   | 31b | Authorship eligibility guidelines and any intended use of professional       |
| 12 |                   |     | writers – <i>lines 484 – 489</i>                                             |
| 13 |                   |     |                                                                              |
| 14 |                   | 31c | Plans, if any, for granting public access to the full protocol, participant- |
| 15 |                   |     | level dataset, and statistical code – <i>lines 361 – 361</i>                 |
| 16 |                   |     |                                                                              |
| 17 |                   |     |                                                                              |
| 18 |                   |     |                                                                              |
| 19 | <b>Appendices</b> |     |                                                                              |
| 20 |                   |     |                                                                              |
| 21 | Informed consent  | 32  | Model consent form and other related documentation given to                  |
| 22 | materials         |     | participants and authorised surrogates – <i>N/A – consent only in Czech</i>  |
| 23 |                   |     | <i>language</i>                                                              |
| 24 |                   |     |                                                                              |
| 25 | Biological        | 33  | Plans for collection, laboratory evaluation, and storage of biological       |
| 26 | specimens         |     | specimens for genetic or molecular analysis in the current trial and for     |
| 27 |                   |     | future use in ancillary studies, if applicable – <i>N/A</i>                  |
| 28 |                   |     |                                                                              |
| 29 |                   |     |                                                                              |

---

\*It is strongly recommended that this checklist be read in conjunction with the SPIRIT 2013 Explanation & Elaboration for important clarification on the items. Amendments to the protocol should be tracked and dated. The SPIRIT checklist is copyrighted by the SPIRIT Group under the Creative Commons "[Attribution-NonCommercial-NoDerivs 3.0 Unported](https://creativecommons.org/licenses/by-nc-nd/3.0/)" license.

# BMJ Open

## Effect of Prophylactic Fibrinogen Concentrate In Scoliosis Surgery (EFISS): a study protocol of two-arm, randomised trial

|                                 |                                                                                                                                                                                                                                                                                                                                                                                                                                                                                                                                                                                                                                                                                                                                                                                                                                                                                                                                                                                                                                                                                                                                                                                                                                                                                                                                                                                                                                                                                                                                                         |
|---------------------------------|---------------------------------------------------------------------------------------------------------------------------------------------------------------------------------------------------------------------------------------------------------------------------------------------------------------------------------------------------------------------------------------------------------------------------------------------------------------------------------------------------------------------------------------------------------------------------------------------------------------------------------------------------------------------------------------------------------------------------------------------------------------------------------------------------------------------------------------------------------------------------------------------------------------------------------------------------------------------------------------------------------------------------------------------------------------------------------------------------------------------------------------------------------------------------------------------------------------------------------------------------------------------------------------------------------------------------------------------------------------------------------------------------------------------------------------------------------------------------------------------------------------------------------------------------------|
| Journal:                        | <i>BMJ Open</i>                                                                                                                                                                                                                                                                                                                                                                                                                                                                                                                                                                                                                                                                                                                                                                                                                                                                                                                                                                                                                                                                                                                                                                                                                                                                                                                                                                                                                                                                                                                                         |
| Manuscript ID                   | bmjopen-2022-071547.R1                                                                                                                                                                                                                                                                                                                                                                                                                                                                                                                                                                                                                                                                                                                                                                                                                                                                                                                                                                                                                                                                                                                                                                                                                                                                                                                                                                                                                                                                                                                                  |
| Article Type:                   | Protocol                                                                                                                                                                                                                                                                                                                                                                                                                                                                                                                                                                                                                                                                                                                                                                                                                                                                                                                                                                                                                                                                                                                                                                                                                                                                                                                                                                                                                                                                                                                                                |
| Date Submitted by the Author:   | 06-Apr-2023                                                                                                                                                                                                                                                                                                                                                                                                                                                                                                                                                                                                                                                                                                                                                                                                                                                                                                                                                                                                                                                                                                                                                                                                                                                                                                                                                                                                                                                                                                                                             |
| Complete List of Authors:       | Vrbica, Kamil; University Hospital Brno, Department of Anaesthesiology and Intensive Care Medicine; Masaryk University Faculty of Medicine, Department of Anaesthesiology and Intensive Care Medicine<br>Hudec, Jan; University Hospital Brno, Department of Anaesthesiology and Intensive Care Medicine; Masaryk University Faculty of Medicine, Department of Anaesthesiology and Intensive Care Medicine<br>Hrdy, Ondrej; University Hospital Brno, Department of Anaesthesiology and Intensive Care Medicine; Masaryk University Faculty of Medicine, Department of Anaesthesiology and Intensive Care Medicine<br>Galko, Michal; University Hospital Brno, Department of Orthopaedic Surgery; Masaryk University Faculty of Medicine, Department of Orthopaedic Surgery<br>Horalkova, Hana; University Hospital Brno, Department of Anaesthesiology and Intensive Care Medicine; Masaryk University Faculty of Medicine, Department of Anaesthesiology and Intensive Care Medicine<br>Demlova, Regina; Masaryk University Faculty of Medicine, Department of Pharmacology/CZECRIN<br>Kubelova, Michaela; Masaryk University Faculty of Medicine, Department of Pharmacology/CZECRIN<br>Repko, Martin; University Hospital Brno, Department of Orthopaedic Surgery; Masaryk University Faculty of Medicine, Department of Orthopaedic Surgery<br>Gal, Roman; University Hospital Brno, Department of Anaesthesiology and Intensive Care Medicine; Masaryk University Faculty of Medicine, Department of Anaesthesiology and Intensive Care Medicine |
| <b>Primary Subject Heading</b>: | Anaesthesia                                                                                                                                                                                                                                                                                                                                                                                                                                                                                                                                                                                                                                                                                                                                                                                                                                                                                                                                                                                                                                                                                                                                                                                                                                                                                                                                                                                                                                                                                                                                             |
| Secondary Subject Heading:      | Paediatrics, Haematology (incl blood transfusion)                                                                                                                                                                                                                                                                                                                                                                                                                                                                                                                                                                                                                                                                                                                                                                                                                                                                                                                                                                                                                                                                                                                                                                                                                                                                                                                                                                                                                                                                                                       |
| Keywords:                       | Scoliosis < ORTHOPAEDIC & TRAUMA SURGERY, PAEDIATRICS, ORTHOPAEDIC & TRAUMA SURGERY, Anaesthesia in orthopaedics < ANAESTHETICS, Blood bank & transfusion medicine < HAEMATOLOGY                                                                                                                                                                                                                                                                                                                                                                                                                                                                                                                                                                                                                                                                                                                                                                                                                                                                                                                                                                                                                                                                                                                                                                                                                                                                                                                                                                        |
|                                 |                                                                                                                                                                                                                                                                                                                                                                                                                                                                                                                                                                                                                                                                                                                                                                                                                                                                                                                                                                                                                                                                                                                                                                                                                                                                                                                                                                                                                                                                                                                                                         |

1  
2  
3  
4  
5  
6  
7  
8  
9  
10  
11  
12  
13  
14  
15  
16  
17  
18  
19  
20  
21  
22  
23  
24  
25  
26  
27  
28  
29  
30  
31  
32  
33  
34  
35  
36  
37  
38  
39  
40  
41  
42  
43  
44  
45  
46  
47  
48  
49  
50  
51  
52  
53  
54  
55  
56  
57  
58  
59  
60

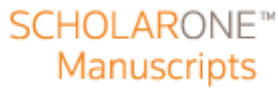

1  
2  
3  
4  
5  
6  
7  
8  
9  
10  
11  
12  
13  
14  
15  
16  
17  
18  
19  
20  
21  
22  
23  
24  
25  
26  
27  
28  
29  
30  
31  
32  
33  
34  
35  
36  
37  
38  
39  
40  
41  
42  
43  
44  
45  
46  
47  
48  
49  
50  
51  
52  
53  
54  
55  
56  
57  
58  
59  
60

# 1      **Effect of Prophylactic Fibrinogen Concentrate In Scoliosis** 2      **Surgery (EFISS): a study protocol of two-arm, randomised trial**

3  
4      Vrbica K<sup>1</sup>, Hudec J<sup>1</sup>, Hrdy O<sup>1</sup>, Galko M<sup>3</sup>, Horalkova H<sup>1</sup>, Demlova R<sup>4</sup>, Kubelova M<sup>4</sup>,  
5      Repko M<sup>3</sup>, Gal R<sup>1</sup>

- 6  
7      1) Department of Anaesthesiology and Intensive Care Medicine, University  
8      Hospital Brno and Faculty of Medicine, Masaryk University, Brno, Czech  
9      Republic  
10     2) Department of Orthopaedic Surgery, University Hospital Brno and Faculty of  
11     Medicine, Masaryk University, Brno, Czech Republic  
12     3) Department of Pharmacology/CZECRIN, Faculty of Medicine, Masaryk  
13     University, Brno, Czech Republic

14      **Correspondence to:** Jan Hudec, hudeja@gmail.com, University Hospital Brno and  
15      Faculty of Medicine, Masaryk University, Brno, Jihlavská 20, 625 00 Brno, Czech  
16      Republic

17      **Word count:** 3828 words

## 39 Abstract

### 41 Introduction

42 Fibrinogen is one of the essential coagulation factors. Preoperative lower  
43 plasma fibrinogen level has been associated with higher blood loss. Scoliosis  
44 surgery presents a challenge for the anaesthetic team, one of the reasons being  
45 blood loss and transfusion management. Recently, the prophylactic fibrinogen  
46 administration has been a debated topic in various indications. It has been described  
47 e.g. in urological or cardiovascular surgery, as well as in paediatrics. This pilot study  
48 is focused on verifying the feasibility of potential large randomised trial and verifying  
49 the safety of prophylactic fibrinogen administration in paediatric scoliosis surgery.

### 50 Methods and analysis

51 A total of 32 paediatric patients indicated for scoliosis surgery will be  
52 recruited. Participants will be randomised into study groups in a 1:1 allocation ratio.  
53 Patients in the intervention group will receive prophylactic single dose of fibrinogen,  
54 in addition to standard of care. Patients in the control group will receive standard of  
55 care without study medication prior to skin incision. The primary aim is to assess the  
56 safety of prophylactic fibrinogen administration during scoliosis surgery in children,  
57 the incidence of any adverse events (AEs) and reactions will be monitored during  
58 participation in the study. The secondary objective is to investigate the additional  
59 safety information, feasibility and efficacy of a prophylactic fibrinogen administration.  
60 The incidence of AEs and reactions according to selected Adverse Events of Special  
61 Interest will be monitored. All collected data will be subjected to statistical analysis  
62 according to a separate Statistical Analysis Plan.

### 63 Ethics and dissemination

64 This trial follows the applicable legislation and requirements for good clinical  
65 practice according to the ICH E6(R2). All essential trial documents were approved by  
66 the relevant ethics committee and national regulatory authority (State Institute for  
67 Drug Control) and their potential amendments will be submitted for approval.

### 68 Trial registration number and protocol version

69 ClinicalTrials.gov Identifier: NCT05391412  
70 EudraCT No.: 2021-005493-25. Protocol version is 1.1 of the date 28/2/2022.

### 73 Key words

74 scoliosis, fibrinogen, paediatrics, orthopaedic, anaesthesiology

### 76 Strength and limitations of the study

- 77 1. Results of this study might improve knowledge about prophylactic fibrinogen  
78 administration in the paediatric population during scoliosis surgery.
- 79 2. The results of this feasibility study will provide data to plan a fully powered  
80 randomised trial.

1  
2  
3 81 3. Results of this study might support the claim about the safety of the fibrinogen  
4 82 administration before surgery.  
5  
6 83

---

7 84 4. The participants are younger than 18 years at the time of recruitment,  
8 85 according to national legislation, the informed consent must be signed by both  
9 86 parents or legal guardians.

10 87 5. The feasibility assessment may indicate a lack of data to determine the  
11 88 influence on blood loss and bleeding management.  
12  
13 89  
14 90  
15 91  
16 92  
17 93  
18 94  
19 95  
20 96  
21 97  
22 98  
23 99  
24 100  
25 101  
26 102  
27 103  
28 104  
29 105  
30 106  
31 107  
32 108  
33 109  
34 110  
35 111  
36 112  
37 113  
38 114  
39 115  
40 116  
41 117  
42 118  
43 119  
44 120  
45 121  
46 122  
47 123  
48  
49  
50  
51  
52  
53  
54  
55  
56  
57  
58  
59  
60

For peer review only

## 124 Background

125 Scoliosis is defined as an abnormal lateral deviation of the spine of more than  
126 10° in the frontal plane, with deviation in the sagittal plane and vertebral rotation. It is  
127 one of the most common spinal deformities in children (1–3). The approach to the  
128 treatment is multidisciplinary and depends on the scoliotic curve severity and  
129 progression (4). The surgery is commonly indicated in patients with progressive  
130 curves and Cobb angle over 40° to stop further progression of the curve and prevent  
131 the development of multiple organ disease (5). Except for musculoskeletal disorders,  
132 cardiovascular, respiratory, gastrointestinal, or psychosocial problems are described  
133 in patients with scoliosis (6). Anaesthesia for scoliosis surgery is a highly challenging  
134 task for the whole team. The specifics of such anaesthesia include e.g. long  
135 operation time, body temperature decrease, high blood losses, positioning, or  
136 intraoperative neurophysiological monitoring (7,8).

137 During scoliosis surgery, high blood loss and the necessity of blood  
138 transfusions are described, while allogeneic derivatives are necessary in the  
139 perioperative period in about 30 % to 60 % of cases (9). Bleeding complications and  
140 adverse events associated with blood transfusions prolong and increase the cost of  
141 hospitalisation and increase the mortality (10). Well-known and commonly applied  
142 approaches to reduce blood loss include antifibrinolytics, such as tranexamic acid,  
143 which can be administered before surgery (11,12), permissive hypotension, which  
144 can be used to reduce blood loss. Prevention of hypothermia is another way to  
145 reduce bleeding, and cell salvage, especially in high-risk patients, where it is  
146 preferred to minimise allogeneic blood transfusions (13).

147 Fibrinogen is essential for clot formation and stopping bleeding (14,15).  
148 Hypofibrinogenemia or dysfibrinogenemia leads to more severe bleeding during  
149 high-extensive surgery (16–18). Moreover, some studies describe less blood loss in  
150 patients with higher preoperative fibrinogen levels (19). Prophylactic administration  
151 of fibrinogen is a widely discussed theme, but to date, the data are limited (20).  
152 Some studies described a significant reduction in blood loss and a secondary  
153 reduction in allogeneic derivatives administration. Prophylactic fibrinogen  
154 administration has been described in cardiovascular or urological surgery (21–23).  
155 Additionally, early administration has been reported to be safe in the paediatric  
156 population (24).

157 However, the effect of prophylactic fibrinogen administration in paediatric  
158 scoliosis surgery remains unclear. We designed this study to verify the feasibility of  
159 prophylactic fibrinogen administration in paediatric scoliosis surgery. The results will  
160 be used to plan a sufficiently large randomised trial with the aim to clarify the impact  
161 of prophylactic fibrinogen application on the magnitude of blood loss and the need  
162 for transfusion. This study is focused on the safety, efficacy, and feasibility of  
163 prophylactic administration of fibrinogen in scoliosis surgery. The clinical outcome of  
164 each participant is studied, particularly the incidence of potential adverse events  
165 such as thromboembolism, allergic reactions, or fevers. The results of this study may

1  
2  
3 166 improve knowledge about prophylactic fibrinogen application. All participants in this  
4 167 study will contribute to this socially beneficial knowledge.  
5  
6 168

## 8 169 **Methods and analysis**

### 9 170 10 171 **Study design**

11 172 The setting of the study is two-arm, prospective, monocentric, randomised,  
12 173 double-blind pilot trial with a 1:1 allocation ratio testing safety, efficacy and feasibility  
13 174 of prophylactic fibrinogen administration during scoliosis surgery in the paediatric  
14 175 population. The pilot study started on 1/6/2022 and the estimated end of the study is  
15 176 planned on 30/9/2023. The study protocol is compiled according to the SPIRIT  
16 177 (Standard Protocol Items: Recommendations for Interventional Trials) checklist (25).  
17  
18 178

### 19 179 **Aims and objectives**

20 180 This pilot study is conducted before designing a fully powered study. This pilot  
21 181 study aims to assess the safety, feasibility, and efficacy of prophylactic fibrinogen  
22 182 administration during scoliosis surgery in the paediatric population. Results from this  
23 183 pilot study will be used to optimise the fully powered study design and determine the  
24 184 final sample size.

25 185 The primary aim of a pilot study is to assess the safety of perioperative  
26 186 infusion of fibrinogen during scoliosis surgery in children. The incidence of any  
27 187 adverse events (AEs), adverse drug reactions, serious adverse events, serious  
28 188 adverse reactions, unexpected adverse reactions and suspected unexpected serious  
29 189 adverse reactions will be monitored during participation in the study. These primary  
30 190 outcomes monitoring respects European directive 2001/20/EC (26).  
31  
32 191

33 192 The secondary aim is to investigate the additional safety information,  
34 193 feasibility and efficacy of a prophylactic administration of fibrinogen. The incidence of  
35 194 adverse events and reactions according to the following Adverse Events of Special  
36 195 Interest (AESI) will be monitored. Monitored AESI include deep vein thrombosis  
37 196 verified on ultrasound imaging, pulmonary embolism confirmed on CT scan and  
38 197 infection or healing disorder requiring re-surgery and/or the initiation of antibiotic  
39 198 therapy. Additional safety information include ICU and hospital length of stay (days)  
40 199 and 28-day mortality.

41 200 Other endpoints and monitored parameters, such as additional safety  
42 201 information, demographic characteristics, laboratory values, comparison of blood  
43 202 loss, or feasibility assessment, are mentioned in the section "Data collection."  
44  
45 203

### 46 204 **Participants**

#### 47 205 *Eligibility criteria*

48 206 All patients admitted to the hospital for scoliosis surgery will be screened for  
49 207 inclusion criteria. When inclusion criteria will be met, the exclusion criteria will be  
50 208 checked. Only patients with fulfilled all inclusion criteria and without all exclusion  
51 209 criteria will be considered for participation in the study.



1  
2  
3 2094 210 *Inclusion criteria are as follows:*

- 6 211 • Elective scoliosis surgery.
- 7 212 • Age < 18 years at the time of enrollment.
- 8 213 • Signed the relevant informed consent form.
- 10 214 • Sexually active participants ( $\geq 15$  years old) must agree to the use of following  
11 215 methods of contraception for the duration of this clinical trial:
  - 12 216 • Women - proper use of a highly reliable method of contraception, i.e.  
14 217 combined hormonal contraception (oral, vaginal or transdermal form),  
15 218 gestagen hormonal contraceptives associated with ovulation inhibition  
16 219 (oral or injectable form) or sexual abstinence.
  - 18 220 • Men - sexual abstinence or the use of an adequate contraceptive  
19 221 method (i.e. condom) in case of sexual intercourse.

20 222 *Exclusion criteria are as follows:*

- 22 223 • Diagnosed congenital or acquired coagulopathy.
- 23 224 • Use of anticoagulants with the exception of perioperative prophylactic  
24 225 administration of low-molecular-weight-heparin (LMWH) to prevent venous  
25 226 thromboembolism (VTE).
- 27 227 • Known hypersensitivity to the active substance or to any of the excipients of  
28 228 Investigational Medicinal Product (IMP).
- 29 229 • History of deep vein thrombosis or pulmonary embolism.
- 31 230 • Pregnancy and lactation.

32 231

### 33 232 **Recruitment and withdrawal**

35 233 The study is conducted at University Hospital Brno, Czech Republic, in  
36 234 cooperation with the Department of Anaesthesiology and Intensive Care Medicine  
37 235 and the Department of Orthopaedic Surgery. The study is controlled by research  
38 236 infrastructure CZECRIN. All patients eligible for the study and the patient's parents/  
39 237 legal guardians will be asked to participate in the EFISS study. The informed consent  
40 238 has to be signed by both parents or legal guardians. For patients who reach the age  
41 239 of 12 at the time of enrollment, adapted written information and an informed consent  
42 240 is prepared considering the level of knowledge and the age of patients. All  
43 241 participants or their parents / legal guardians can withdraw at any time without giving  
44 242 any reason, but they must notify the investigator.

45 243

### 46 244 **Sample size**

48 245 Since this is a pilot study, a power calculation to determine sample size is not  
49 246 required. The sample size was defined in consensus by the State Institute of Drug  
50 247 Control of the Czech Republic, statisticians and investigators. Thirty participants (15  
51 248 in both arms) were defined as a sample size according to standard guidelines for  
52 249 pilot studies and recommendation of good practice (27–29). Considering a 5%  
53 250 dropout rate, 32 participants will be recruited.

54 251

### 55 252 **Randomisation and blinding**

1  
2  
3 253 Patients will be randomised in a 1:1 ratio to receive fibrinogen or standard of  
4 254 care without further study medication. Randomisation will be performed electronically  
5 255 in the electronic case report form (eCRF) REDCap database. This eCRF was  
6 256 created by study statisticians and study data managers and contains a  
7 257 randomization list. Unblinded person will perform the randomization after controlling  
8 258 all inclusions and exclusions criteria before induction to the anaesthesia. Based on  
9 259 the randomisation process, an unblinded person indicates IMP application / non-  
10 260 application before skin incision.

11 261 The study medication will be prepared by the unblinded study nurse outside  
12 262 the operating theatre. It will be administered after induction of anaesthesia before the  
13 263 beginning of surgery under the supervision of an unblinded investigator. The study  
14 264 nurse and investigator will be unblinded for the duration of this study and will not be  
15 265 part of the operating team. The blinded surgical team (orthopaedist,  
16 266 anaesthesiologist, and anaesthesiology nurse) will be outside the theatre during the  
17 267 IMP application / non-application. The unblinded study team maintains the  
18 268 anaesthesia respecting local protocol for paediatric scoliosis anaesthesia during the  
19 269 IMP application / non-application. After IMP application/ non-application, unblinded  
20 270 study nurse and unblinded investigator will leave the operating room, and the blinded  
21 271 operating team will enter back to the theatre. Based on these blinding measures, we  
22 272 are able to ensure absolute blinding of the surgical team.

23 273 The data management group and statisticians will work with a pseudo-  
24 274 anonymised data set. Emergency unblinding before the end of the study should  
25 275 occur only in exceptional circumstances when knowledge of the actual treatment is  
26 276 necessary for further management of the patient's treatment. This activity can be  
27 277 performed directly in the REDCap electronic database. The investigator must report  
28 278 all unblindings (with reason) as they occur on the corresponding eCRF page.  
29 279

## 30 280 **Intervention**

### 31 281 *Choice of comparators*

32 282 Bleeding and coagulopathy are present during scoliosis surgery, and lack of  
33 283 fibrinogen plays a crucial role in it. We decided to reduce blood loss and  
34 284 coagulopathy development, the fibrinogen will be administered preventively in the  
35 285 intervention arm. The standard of care presents respecting local protocol based on  
36 286 international guidelines (see below). This standard approach will be compared with  
37 287 the intervention.

### 38 288 *Standard of care*

39 289 All study participants will receive standard of care in blood and coagulation  
40 290 management for scoliosis surgery. Blood tests including haemoglobin (Hb),  
41 291 hematocrit (Htc), platelet count (Plt), fibrinogen level (Fbg), activated partial thrombin  
42 292 time (aPTT), prothrombin time (PT), and thrombin time (TT) will be performed before  
43 293 the surgery. Values will be checked before surgery, and in case of significant  
44 294 pathology, the surgery will be delayed and the haematologist will be invited.  
45 295 Tranexamic acid will be administered to all patients before the skin incision in a dose  
46 296 of 10-15 mg/kg. The standard of care includes the restrictive administration of blood

1  
2  
3 297 transfusion, plasma derivative, and fluids during the perioperative period. The  
4 298 anesthesiologist or attending physician in the ICU will administer fluids, blood  
5 299 transfusions, and derivatives depending on clinical judgement, blood loss, blood  
6 300 count, coagulation tests, and vital signs. This administration is directed by the local  
7 301 protocol of the investigator's hospital which respects international guidelines. "Goal  
8 302 directed therapy" approach is preferred in case of bleeding in perioperative period.  
9 303 When the blood loss exceeds about 25% of estimated total blood volume of the  
10 304 patient, blood samples (blood count, coagulation status and/or viscoelastic  
11 305 haemostatic assay) are performed and blood transfusions and derivatives are  
12 306 managed according to the results. The goals during bleeding are haemoglobin 7-9  
13 307 g/dL, fibrinogen above 2 g/L, platelets above  $50 \times 10^9/L$  and normalisation of  
14 308 coagulation status. In case of life-threatening bleeding, the transfusion strategy of  
15 309 fibrinogen concentrate with red blood cells or fresh frozen plasma with red blood  
16 310 cells in ratio of at least 1:2 is performed. The local protocol respects international  
17 311 guidelines (30).

### 312 *Intervention description*

313 Participants in the intervention group will receive the standard of care, and in  
314 addition, a single dose of fibrinogen prior to the skin incision. IMP is administered  
315 intravenously and is immediately available at a plasma concentration corresponding  
316 to the dose. It is in a powder form in a vial, and it is necessary to solve this powder  
317 carefully. The reconstitution procedure should follow the instructions in the package  
318 leaflet. Patients in the intervention group will receive a single dose of IMP  
319 intravenously, 20–30 mg/kg. This dose range is based on the package leaflet and  
320 investigators will administer IMP in doses of hundreds of mg in this range (rounded  
321 to closest hundred in dose range). The medicinal product will be diluted in a 100 ml  
322 infusion bag and will be administered after induction to anaesthesia before surgery.  
323 The infusion rate should not exceed approximately 5 ml per minute. The IMP will be  
324 administered according to the above study blinding rules.

325

### 326 **Comparison**

327 Participants in the intervention group will receive standard of care and IMP  
328 before skin incision. Participants in the control group will receive standard of care  
329 without study medication before skin incision. In the control group the placebo will  
330 not be administered. It is caused by the requirements of the national regulatory  
331 authority (State Institute of Drug Control of the Czech Republic), which does not  
332 allow the administration of a placebo in the paediatric population unless it has  
333 therapeutic or preventive effect.

334 The blinded operating team will manage both groups according to the  
335 standard of care after the initial intervention/non-intervention. Therefore, fibrinogen  
336 can be administered to all patients if indicated in perioperative period according to  
337 the local protocol for bleeding management (see above).

338 Primary and secondary outcomes will be compared between intervention and  
339 control groups to assess the potential feasibility of a large-scale study.

340

### 341 **Trial feasibility**

342 The trial feasibility assessment is one of the secondary aims of this study. We  
343 will monitor the recruitment rate of eligible patients who will be approached for  
344 consent to participate. The feasibility criterion is more than 75 % of enrolled  
345 participants. We will also evaluate the percentage of missing outcomes and clinical  
346 data. The goal is to have less than 10 % missing outcome data, including ICU and  
347 hospital length of stay (LOS) and survival, and less than 10% missing clinical data  
348 obtained from clinical medical notes and electronic patient records.

### 350 **Clinical outcomes**

351 The clinical outcome focuses on reducing blood loss and transfusions in  
352 paediatric patients after prophylactic fibrinogen administration during scoliosis  
353 surgery. Blood loss and plasma derivatives management will be reported for each  
354 participant. Blood count and coagulation parameters will be monitored before  
355 surgery, in the end, and 24 hours after the surgery. All parameters will be recorded in  
356 the eCRF database.

### 358 **Data collection**

359 During the course of the trial, subjects will be monitored during hospitalisation  
360 and after discharge. According to medical records, all data will be collected in an  
361 eCRF. Data of blood count (Hb, Hct, Plt) and coagulation status (PT, aPTT, TT, Fbg)  
362 will be filled in eCRF before surgery, after surgery, and 24 hours after surgery.  
363 Information about inclusion and exclusion criteria, informed consent, and  
364 demographic data will be obtained on the day of enrollment. Collected participant  
365 demographic data will be age (years), sex (male, female), weight (kilograms) and  
366 Cobb's angle (°). Blood samples will be taken before surgery according to standard  
367 of care, post-operative blood samples will be taken immediately after surgery and 24  
368 h after surgery. We will record operative time, blood loss, the volume of blood loss  
369 for the surgical segment of the spine, and urinary output during surgery and 24 hours  
370 after surgery. We will track the number, type, and volume of administered transfusion  
371 products, plasma derivatives, crystalloid solutions, and colloid solutions during  
372 surgery and in 24 hours postoperative period. The critical part of monitored data will  
373 be the incidence of adverse events and reactions according to the following AESI.  
374 These reactions will include deep-vein thrombosis verified on ultrasound imaging,  
375 pulmonary embolism confirmed on CT, infection or healing disorder requiring re-  
376 surgery, and/or the initiation of antibiotic therapy. Ultrasound imaging or CT scan will  
377 be indicated individually, only in patients with suspicion of AESI according to the  
378 clinical condition.

379  
380 Other monitored additional safety information will be:

- 381 • Hospital LOS.
- 382 • Intensive care length of stay (ICU LOS) (day of admission and day of  
383 discharge will be counted as one day).

- 384 • 28-day mortality (number of patients who are not alive 28 days after  
385 randomization).

386 According to the SPIRIT checklist the schedule of enrollment, interventions, and  
387 assessments is summarised in Table 1 (25).

388

389 **Table 1:** Clinical trial schedule

| TIMEPOINT                                     | STUDY PERIOD |            |                 |       |                    |           |                       |
|-----------------------------------------------|--------------|------------|-----------------|-------|--------------------|-----------|-----------------------|
|                                               | Screening    | Allocation | Post-allocation |       | Hospital discharge | Follow-up | Premature termination |
|                                               | $D_0$        | $D_{0-1}$  | $D_1$           | $D_2$ | $D_{3-28}$         | $D_{28}$  | Anytime               |
| <b>ENROLMENT:</b>                             |              |            |                 |       |                    |           |                       |
| Inclusion/Exclusion criteria                  | X            |            |                 |       |                    |           |                       |
| Informed consent                              | X            |            |                 |       |                    |           |                       |
| Pregnancy testing <sup>1</sup>                | X            |            |                 |       |                    |           |                       |
| Randomization                                 |              | X          |                 |       |                    |           |                       |
| <b>INTERVENTION:</b>                          |              |            |                 |       |                    |           |                       |
| Study medication application <sup>2</sup>     |              |            | X               |       |                    |           |                       |
| <b>ASSESSMENTS:</b>                           |              |            |                 |       |                    |           |                       |
| Demographic data <sup>3</sup>                 | X            |            |                 |       |                    |           |                       |
| Adverse events                                |              |            | X               | X     | X                  | X         | X                     |
| Laboratory testing <sup>4</sup>               |              |            | X               | X     |                    |           |                       |
| Blood loss <sup>5</sup>                       |              |            | X               | X     |                    |           |                       |
| Urinary output <sup>6</sup>                   |              |            | X               | X     |                    |           |                       |
| Transfusion products consumption <sup>7</sup> |              |            | X               | X     |                    |           |                       |
| Fluid therapy <sup>7</sup>                    |              |            | X               | X     |                    |           |                       |
| ICU LOS (days)                                |              |            |                 |       | X                  |           |                       |
| LOS (days)                                    |              |            |                 |       | X                  |           |                       |
| 28-day mortality                              |              |            |                 |       |                    | X         |                       |
| Reason for premature termination              |              |            |                 |       |                    |           | X                     |

390

391 1 urine pregnancy testing

392 2 fibrinogen infusion or standard of care

393 3 age, sex, weight, Cobb's angle

394 4 haemoglobin, haematocrit, platelet count, fibrinogen, aPTT, PT, TT

395 5 volume (ml) during surgery and in the 24-hour postoperative period and volume (ml) related to the surgical segment of the spine

396 6 volume (ml) in the 24-hour postoperative period

397 7 type and volume (ml) during surgery and in the 24-hour postoperative period

398

399

400

401

402

403

404

405

406

407

408

409

410

All study-related information will be stored securely at the study site. All participant information will be stored in locked file cabinets in areas with limited access. All local databases will be secured with password-protected access systems. Forms, lists, logbooks, appointment books, and other listings that link participant ID numbers to additional identifying information will be stored in a locked file in an area with limited access. No later than 3 years after the collection of the 1-year post-randomization, we will deliver a completely blinded data set to an

1  
2  
3 408 appropriate data repository for sharing purposes. Statistical codes will be archived in  
4 409 accordance with SOPs.

5 410

### 7 411 **Statistical analysis**

8 412 A separate Statistical Analysis Plan (SAP) will be prepared to provide details  
9 413 on the approach to analyses. The SAP will be finalised before the database lock. All  
10 414 eventual deviations from the SAP will be described and justified in the relevant part  
11 415 of the Clinical Trial Report. As a general approach for the descriptive analysis, the  
12 416 following statistics will be provided for continuous variables: the number of subjects  
13 417 with available data (n), mean, standard deviation, median, minimum and maximum.  
14 418 The number and percentage of patients will be provided for categorical variables. For  
15 419 a comparison of continuous variables between treatment groups two-sample t-test or  
16 420 its nonparametric alternative Mann-Whitney test will be used, where appropriate.  
17 421 Pearson's chi-square test or Fisher exact test will be used to compare categorical  
18 422 variables, where appropriate. All statistical tests will be two-sided. P-values < 0.05  
19 423 will constitute statistically significant differences. During the pilot study the interim  
20 424 analysis is not planned.

21 425 Protocol non-adherence will be assessed by the principal investigator case by  
22 426 case. Patients with major deviations from the study protocol will be excluded from  
23 427 the analysis. Missing data are not planned to be imputed. However, in the event of  
24 428 substantial missing data for any parameter, a sensitivity analysis using any method  
25 429 of imputation could also be used.

### 26 430 **Patient and public involvement**

27 431 Patients or the public will not be involved in the study development. This  
28 432 EFISS study was proposed and designed by an expert team of University Hospital  
29 433 Brno and the Faculty of Medicine, Masaryk University Brno in the Czech Republic.  
30 434

### 31 435 **Monitoring and auditing**

32 436 The trial centre will be monitored according to the monitoring plan provided by  
33 437 research infrastructure CZECRIN. The objectives of the monitoring are to ensure that  
34 438 the trial participant's safety and rights are respected, that accurate, valid and  
35 439 complete data are collected, and that the trial is conducted in accordance with the  
36 440 trial protocol, the principles of GCP and national legislation. Sponsor, Regulatory  
37 441 authority and Ethics committees have the right to inspect/audit the trial site.  
38 442

### 39 443 **Ethics and dissemination**

40 444 This trial follows the applicable legislation and requirements for good clinical  
41 445 practice according to the ICH E6(R2). Compliance with this standard provides public  
42 446 assurance that the rights, safety, and well-being of trial participants are protected  
43 447 and that the clinical trial data are credible.

44 448 All essential trial documents were approved by the relevant ethics committee  
45 449 and national regulatory authority (State Institute for Drug Control) and their potential  
46 450 amendments will be submitted for approval. The study was approved by University  
47 451 hospital Brno's Ethics Committee (No.: 24/22MONO) and by State Institute for Drug

1  
2  
3 452 Control (No.: sukls11048/2022). This clinical study includes patients belonging to the  
4 453 category of vulnerable subjects, namely children and adolescents under 18 years of  
5 454 age.

#### 7 455 *Informed consent procedure*

8 456 The parents / legal guardians will receive written information and an informed  
9 457 consent form (ICF). The investigator will inform in a comprehensible manner about  
10 458 the nature, purpose, and significance of the clinical trial simultaneously. This  
11 459 procedure will take place before enrolling the child in the study. Parents / legal  
12 460 guardians will also be informed of the measures to protect personal data. That  
13 461 liability insurance has been arranged for investigators and sponsors in the event of  
14 462 health damage due to a clinical trial, including possible compensation for trial  
15 463 subjects. Paediatric patients will receive from the investigator information on the  
16 464 clinical trial adapted to their level of knowledge and intellectual abilities, including  
17 465 details on the benefits and risks of participating in this clinical trial. The explicit wish  
18 466 of instructed paediatric patients to refuse to participate or to withdraw from a clinical  
19 467 trial at any time is always respected. Written information and an informed assent  
20 468 form are prepared for patients who reach the age of 12 at the time of enrollment.  
21 469 Paediatric patients and their parents / legal guardians will get sufficient time to study  
22 470 the written information and the informed consent form carefully and will ask  
23 471 additional questions to which the investigator must respond satisfactorily. All legal  
24 472 representatives (both parents) will must sign the informed consent form at the end of  
25 473 the process.

#### 32 474 *Supervision of the informed consent procedure*

33 475 The process of obtaining informed consent from the patient's parents / legal  
34 476 guardians, or patients, must always be adequately documented by the investigator  
35 477 using valid forms and the patient's medical records. The clinical trial monitor will  
36 478 check the process during monitoring visits. Significant deviations in the process will  
37 479 lead to the termination of the patient's participation in the trial.  
40 480

## 41 481 **Discussion**

42 482 Prophylactic fibrinogen administration before high-risk surgeries is a widely  
43 483 discussed topic across medical fields. Preoperative lower levels of fibrinogen are  
44 484 associated with higher blood loss in adolescent idiopathic scoliosis surgery.  
45 485 However, if the effect of prophylactic fibrinogen administration will lead to blood loss  
46 486 reduction in these patients is unclear (17,18,31).

47 487 The safety of fibrinogen administration in the paediatric population has been  
48 488 demonstrated in several studies (24,32). However, in these studies, fibrinogen was  
49 489 substituted during the surgery according to the viscoelastic haemostatic assays, the  
50 490 substitution was not prophylactic. In addition, the number of participants was low. In  
51 491 summary, data on prophylactic administration in children and adolescents are  
52 492 insufficient, more studies are needed.

53 493 We can see some similarity with tranexamic acid administration. In recent  
54 494 years, tranexamic acid has been commonly used in scoliosis surgery to reduce blood  
55  
56  
57  
58  
59  
60

1  
2  
3 495 loss (33–35). The efficacy of tranexamic acid is unambiguous, it reduces blood loss,  
4 496 the need for blood transfusions and the length of hospitalisation (33). The use of  
5 497 tranexamic acid is incorporated in orthopaedic recommendations for blood  
6 498 management (36). However, some studies have provided evidence of the  
7 499 thromboembolic potential of tranexamic acid (37,38). In contrast, fibrinogen is not  
8 500 associated with higher thromboembolic risk repeatedly (39). It is appropriate to study  
9 501 fibrinogen concentrate to see if it has the same positive properties as tranexamic  
10 502 acid without possible side effects.

11 503 This pilot study also has some limitations. The sample size is designed  
12 504 according to standard guidelines for pilot studies, so it is limited to 32 patients.  
13 505 Participants are under the age of 18, so informed consent has to be signed by both  
14 506 parents or legal guardians, which may lead to limited enrollment. Data are collected  
15 507 28 days after randomisation, which may not be an adequate interval to evaluate  
16 508 safety and feasibility. And final limitation is the absence of placebo administration in  
17 509 the standard of care group. This absence is mainly caused by the requirements of  
18 510 the national regulatory authority, which does not allow the administration of a  
19 511 placebo without a therapeutic or preventive effect in the paediatric population.  
20 512

## 21 513 **Conclusion**

22 514 This pilot study should demonstrate the safety and feasibility of the intended  
23 515 intervention and form the basis for a later large study which could have extensive  
24 516 impact in scoliosis surgery and bleeding management. But the results will not prove  
25 517 most likely the efficacy of prophylactic administration of fibrinogen in scoliosis  
26 518 surgery.  
27 519

---

## 28 520 **Acknowledgements**

29 521 The authors thank everyone involved in the study, concretely the participants,  
30 522 assessors and all health care providers taking care for participants.  
31 523

## 32 524 **Contributions**

33 525 OH, RG first conceived this protocol after revision from the other authors. KV,  
34 526 JH, MG are the main authors and editors of this manuscript. MG, MR are responsible  
35 527 for patient involvement. JH, KV, HH provide standards of care. CZECRIN (MK, RD)  
36 528 assisted in the development of the study protocol and is responsible for statistical  
37 529 analysis. All authors read and approved the final version of the manuscript.  
38 530  
39 531  
40 532

## 41 533 **Sponsor**

42 534 Name and contact information for the trial sponsor:

43 535 Trial Sponsor: Masaryk University Brno

44 536 Contact name: prof. Martin Smrcka, MD, PhD, MBA  
45 537  
46 538  
47 539  
48 540



1  
2  
3 537 Address: Jihlavská 20, 625 00 Brno

4  
5 538 Telephone: +420532232884

6 539 Email: [smrcka.martin@fnbrno.cz](mailto:smrcka.martin@fnbrno.cz)

7  
8 540

9  
10 541 The sponsor has no role in the design of this trial and will not have any role during its  
11 542 execution, analyses, interpretation of the data, or the decision to submit results.

12  
13  
14 543

### 15 544 **Funding**

16 545 The project was supported by Specific University Research provided by MSMT  
17 546 (MUNI/A/1336/2022) and by the Ministry of Health, Czech Republic - conceptual  
18 547 development of research organisation (FNBr, 65269705). The project was supported  
19 548 by the national budget through MEYS, RI CZECRIN (LM2018128).

20  
21 549

### 22 550 **Conflict of interest**

23  
24  
25 551 In the past 5 years, KV and RG have received honoraria for lecturing from  
26 552 CSL Behring.

27 553

### 28 554 **Plan**

29  
30 555 We intend to submit the results of the study to be published in a peer-reviewed  
31 556 international medical journal. The author team will not change.

32  
33  
34 557

35  
36 558

37  
38  
39 559

40  
41 560

42  
43 561

44  
45 562

46  
47 563

48  
49 564

50  
51 565

52  
53 566

54  
55 567

56  
57 568

## References

1. El-Hawary R, Chukwunyerenwa C. Update on evaluation and treatment of scoliosis. *Pediatr Clin North Am.* 2014 ;61(6):1223–41. Available from: <https://pubmed.ncbi.nlm.nih.gov/25439021/>
2. Kim HJ, Blanco JS, Widmann RF. Update on the management of idiopathic scoliosis. *Curr Opin Pediatr.* 2009 Feb;21(1):55–64. Available from: <https://pubmed.ncbi.nlm.nih.gov/19242241/>
3. Konieczny MR, Senyurt H, Krauspe R. Epidemiology of adolescent idiopathic scoliosis. *J Child Orthop.* 2013 Feb 1;7(1):3–9. Available from: <https://pubmed.ncbi.nlm.nih.gov/24432052/>
4. Blevins K, Battenberg A, Beck A. Management of Scoliosis. *Adv Pediatr.* 2018 Aug 1;65(1):249–66. Available from: <https://pubmed.ncbi.nlm.nih.gov/30053928/>
5. Parr A, Askin G. Paediatric scoliosis: Update on assessment and treatment. *Aust J Gen Pract.* 2020 Dec 1;49(12):832–7. Available from: <https://pubmed.ncbi.nlm.nih.gov/33254215/>
6. Sheehan DD, Grayhack J. Pulmonary Implications of Pediatric Spinal Deformities. *Pediatr Clin North Am.* 2021 Feb 1;68(1):239–59. Available from: <https://pubmed.ncbi.nlm.nih.gov/33228935/>
7. Weissmann KA, Lafage V, Pitaque CB, Lafage R, Huaiquilaf CM, Ang B, et al. Neuromuscular Scoliosis: Comorbidities and Complications. *Asian Spine J.* 2021;15(6):778–90. Available from: <https://pubmed.ncbi.nlm.nih.gov/33355852/>
8. Gibson PRJ. Anaesthesia for correction of scoliosis in children. *Anaesth Intensive Care.* 2004;32(4):548–59. Available from: <https://pubmed.ncbi.nlm.nih.gov/15675216/>
9. Chen W, Shen J, Zhang Y, Hu A, Liang J, Ma L, et al. A randomised controlled trial of fibrinogen concentrate during scoliosis surgery. *Anaesthesia.* 2020 Nov 1; 75(11):1476–81. Available from: <https://pubmed.ncbi.nlm.nih.gov/32500569/>
10. Lavoie J. Blood transfusion risks and alternative strategies in pediatric patients. *Paediatr Anaesth.* 2011 Jan;21(1):14–24. Available from: <https://pubmed.ncbi.nlm.nih.gov/21155923/>
11. Wang M, Zheng XF, Jiang LS. Efficacy and Safety of Antifibrinolytic Agents in Reducing Perioperative Blood Loss and Transfusion Requirements in Scoliosis Surgery: A Systematic Review and Meta-Analysis. *PLoS One.* 2015 Sep 18;10(9). Available from: <https://pubmed.ncbi.nlm.nih.gov/26382761/>
12. McNicol ED, Tzortzopoulou A, Schumann R, Carr DB, Kalra A. Antifibrinolytic agents for reducing blood loss in scoliosis surgery in children. *Cochrane Database*

- 1  
2  
3 606 Syst Rev. 2016 Sep 19;9(9):CD006883. Available from:  
4 607 <https://pubmed.ncbi.nlm.nih.gov/27643712/>  
5  
6  
7 608 13. Klein AA, Bailey CR, Charlton AJ, Evans E, Guckian-Fisher M, McCrossan R, et  
8 609 al. Association of Anaesthetists guidelines: cell salvage for peri-operative blood  
9 610 conservation 2018. *Anaesthesia*. 2018 Sep 1;73(9):1141–50. Available from:  
10 611 <https://pubmed.ncbi.nlm.nih.gov/29989144/>  
11  
12  
13 612 14. May JE, Wolberg AS, Lim MY. Disorders of Fibrinogen and Fibrinolysis. *Hematol*  
14 613 *Oncol Clin North Am* . 2021 Dec 1;35(6):1197–217. Available from:  
15 614 <https://pubmed.ncbi.nlm.nih.gov/34404562/>  
16  
17  
18 615 15. Kattula S, Byrnes JR, Wolberg AS. Fibrinogen and Fibrin in Hemostasis and  
19 616 Thrombosis. *Arterioscler Thromb Vasc Biol* . 2017 Mar 1;37(3):e13–21. Available  
20 617 from: <https://pubmed.ncbi.nlm.nih.gov/28228446/>  
21  
22  
23 618 16. Naik BI, Pajewski TN, Bogdonoff DL, Zuo Z, Clark P, Terkawi AS, et al.  
24 619 Rotational thromboelastometry-guided blood product management in major spine  
25 620 surgery. *J Neurosurg Spine*. 2015 Aug 1;23(2):239–49. Available from:  
26 621 <https://pubmed.ncbi.nlm.nih.gov/26053893/>  
27  
28  
29 622 17. Geck MJ, Singh D, Gunn H, Stokes JK, Truumees E. Is Preoperative Fibrinogen  
30 623 Testing Associated With Total Blood Loss in Adolescent Idiopathic Scoliosis  
31 624 Correction? *Spine Deform*. 2017 Nov 1;5(6):381–6. Available from:  
32 625 <https://pubmed.ncbi.nlm.nih.gov/29050713/>  
33  
34  
35 626 18. Geck MJ, Singh D, Gunn H, Stokes JK, Truumees E. Relationship Between  
36 627 Preoperative Plasma Fibrinogen Concentration, Perioperative Bleeding, and  
37 628 Transfusions in Elective Adult Spinal Deformity Correction. *Spine Deform*. 2019 Sep  
38 629 1;7(5):788–95. Available from: <https://pubmed.ncbi.nlm.nih.gov/31495480/>  
39  
40  
41 630 19. Carling MS, Jeppsson A, Wessberg P, Henriksson A, Baghaei F, Brisby H.  
42 631 Preoperative fibrinogen plasma concentration is associated with perioperative  
43 632 bleeding and transfusion requirements in scoliosis surgery. *Spine (Phila Pa 1976)*.  
44 633 2011 Apr 1;36(7):549–55. Available from:  
45 634 <https://pubmed.ncbi.nlm.nih.gov/21079540/>  
46  
47  
48 635 20. Grottke O, Schöchl H, Levy JH, Hunt BJ. Supplementary fibrinogen in the  
49 636 management of bleeding: re-evaluation of data from clinical trials. *Br J Anaesth*.  
50 637 2018 Feb 1;120(2):407–9. Available from:  
51 638 <https://pubmed.ncbi.nlm.nih.gov/29406192/>  
52  
53  
54 639 21. Ranucci M, Baryshnikova E, Crapelli GB, Rahe-Meyer N, Menicanti L, Frigiola A,  
55 640 et al. Randomized, double-blinded, placebo-controlled trial of fibrinogen concentrate  
56 641 supplementation after complex cardiac surgery. *J Am Heart Assoc*. 2015;4(6).  
57 642 Available from: <https://pubmed.ncbi.nlm.nih.gov/26037084/>  
58  
59  
60

- 1  
2  
3 643 22. Soleimani M, Masoumi N, Nooraei N, Lashay A, Safarinejad MR. The effect of  
4 644 fibrinogen concentrate on perioperative bleeding in transurethral resection of the  
5 645 prostate: a double-blind placebo-controlled and randomized study. *J Thromb*  
6 646 *Haemost.* 2017 Feb 1;15(2):255–62. Available from:  
7 647 <https://pubmed.ncbi.nlm.nih.gov/27888575/>
- 10 648 23. Fathi M, Lashay A, Massoudi N, Nooraei N, Nik MA. Fibrinogen prophylaxis for  
11 649 reducing perioperative bleeding in patients undergoing radical cystectomy: A double-  
12 650 blind placebo-controlled randomized trial. *J Clin Anesth.* 2021 Oct 1;73. Available  
13 651 from: <https://pubmed.ncbi.nlm.nih.gov/34098395/>
- 16 652 24. Haas T, Spielmann N, Restin T, Seifert B, Henze G, Obwegeser J, et al. Higher  
17 653 fibrinogen concentrations for reduction of transfusion requirements during major  
18 654 paediatric surgery: A prospective randomised controlled trial. *Br J Anaesth.* 2015  
19 655 Aug 1;115(2):234–43. Available from: <https://pubmed.ncbi.nlm.nih.gov/25982134/>
- 23 656 25. Chan AW, Tetzlaff JM, Altman DG, Laupacis A, Gøtzsche PC, Krleža-Jerić K, et  
24 657 al. SPIRIT 2013 statement: defining standard protocol items for clinical trials. *Ann*  
25 658 *Intern Med.* 2013 Feb 5;158(3):200–7. Available from:  
26 659 <https://pubmed.ncbi.nlm.nih.gov/23295957/>
- 29 660 26. European Parliament and Council of the European Union (2001) Directive  
30 661 2001/20/EC of the European Parliament and the Council of 4 Apr 2001. OJ L 121:  
31 662 34–44. Available: [http://eudract.emea.eu.int/docs/Dir2001-20\\_en.pdf](http://eudract.emea.eu.int/docs/Dir2001-20_en.pdf).
- 34 663 27. Hertzog MA. Considerations in determining sample size for pilot studies. *Res*  
35 664 *Nurs Health.* 2008 Apr;31(2):180–91. Available from:  
36 665 <https://pubmed.ncbi.nlm.nih.gov/18183564/>
- 38 666 28. Thabane L, Ma J, Chu R, Cheng J, Ismaila A, Rios LP, et al. A tutorial on pilot  
39 667 studies: the what, why and how. *BMC Med Res Methodol.* 2010;10. Available from:  
40 668 <https://pubmed.ncbi.nlm.nih.gov/20053272/>
- 43 669 29. Lancaster GA, Dodd S, Williamson PR. Design and analysis of pilot studies:  
44 670 recommendations for good practice. *J Eval Clin Pract.* 2004 May;10(2):307–12.  
45 671 Available from: <https://pubmed.ncbi.nlm.nih.gov/15189396/>
- 48 672 30. Kozek-Langenecker SA, Ahmed AB, Afshari A, Albaladejo P, Aldecoa C,  
49 673 Barauskas G, et al. Management of severe perioperative bleeding: guidelines from  
50 674 the European Society of Anaesthesiology: First update 2016. *Eur J Anaesthesiol.*  
51 675 2017 Jun 1;34(6):332–95. Available from:  
52 676 <https://pubmed.ncbi.nlm.nih.gov/28459785/>
- 55 677 31. Carling MS, Zarhoud J, Jeppsson A, Eriksson BI, Brisby H. Preoperative plasma  
56 678 fibrinogen concentration, factor XIII activity, perioperative bleeding, and transfusions  
57 679 in elective orthopaedic surgery: A prospective observational study. *Thromb Res.*  
58 680 2016 Mar 1;139:142–7. Available from: <https://pubmed.ncbi.nlm.nih.gov/26916312/>

- 1  
2  
3 681 32. Haas T, Goobie S, Spielmann N, Weiss M, Schmutz M. Improvements in  
4 682 patient blood management for pediatric craniostomy surgery using a ROTEM(®)  
5 683 -assisted strategy - feasibility and costs. *Paediatr Anaesth*. 2014;24(7):774–80.  
6 684 Available from: <https://pubmed.ncbi.nlm.nih.gov/24417649/>  
7  
8  
9 685 33. Goobie SM, Zurakowski D, Glotzbecker MP, McCann ME, Hedequist D,  
10 686 Brustowicz RM, et al. Tranexamic Acid Is Efficacious at Decreasing the Rate of  
11 687 Blood Loss in Adolescent Scoliosis Surgery: A Randomized Placebo-Controlled  
12 688 Trial. *J Bone Joint Surg Am*. 2018;100(23):2024–32. Available from:  
13 689 <https://pubmed.ncbi.nlm.nih.gov/30516625/>  
14  
15  
16 690 34. Shrestha IK, Ruan TY, Lin L, Tan M, Na XQ, Qu QC, et al. The efficacy and  
17 691 safety of high-dose tranexamic acid in adolescent idiopathic scoliosis: a meta-  
18 692 analysis. *J Orthop Surg Res*. 2021 Dec 1;16(1):1–9. Available from:  
19 693 <https://pubmed.ncbi.nlm.nih.gov/33446219/>  
20  
21  
22 694 35. Hasan MS, Yunus SN, Ng CC, Chan CYW, Chiu CK, Kwan MK. Tranexamic  
23 695 Acid in Pediatric Scoliosis Surgery: A Prospective Randomized Trial Comparing  
24 696 High-dose and Low-dose Tranexamic Acid in Adolescent Idiopathic Scoliosis  
25 697 Undergoing Posterior Spinal Fusion Surgery. *Spine (Phila Pa 1976)*. 2021 Nov  
26 698 15;46(22):E1170–7. Available from: <https://pubmed.ncbi.nlm.nih.gov/33882541/>  
27  
28  
29 699 36. Palmer AJR, Gagné S, Fergusson DA, Murphy MF, Grammatopoulos G. Blood  
30 700 Management for Elective Orthopaedic Surgery. *J Bone Joint Surg Am*. 2020 Sep  
31 701 2;102(17):1552–64. Available from: <https://pubmed.ncbi.nlm.nih.gov/32558663/>  
32  
33  
34 702 37. Myers SP, Kutcher ME, Rosengart MR, Sperry JL, Peitzman AB, Brown JB, et al.  
35 703 Tranexamic acid administration is associated with an increased risk of posttraumatic  
36 704 venous thromboembolism. *Journal of Trauma and Acute Care Surgery*. 2019 Jan  
37 705 1;86(1):20–7. Available from: <https://pubmed.ncbi.nlm.nih.gov/30239375/>  
38  
39  
40 706 38. Roberts I, Shakur-Still H, Afolabi A, Akere A, Arribas M, Brenner A, et al. Effects  
41 707 of a high-dose 24-h infusion of tranexamic acid on death and thromboembolic events  
42 708 in patients with acute gastrointestinal bleeding (HALT-IT): an international  
43 709 randomised, double-blind, placebo-controlled trial. *Lancet*. 2020 Jun  
44 710 20;395(10241):1927–36. Available from: <https://pubmed.ncbi.nlm.nih.gov/32563378/>  
45  
46  
47 711 39. Ng KT, Yap JLL, Kwok PE. The effect of fibrinogen concentrate on postoperative  
48 712 blood loss: A systematic review and meta-analysis of randomized controlled trials. *J*  
49 713 *Clin Anesth*. 2020 Aug 1;63. Available from:  
50 714 <https://pubmed.ncbi.nlm.nih.gov/32193125/>  
51  
52  
53  
54  
55  
56  
57  
58  
59  
60

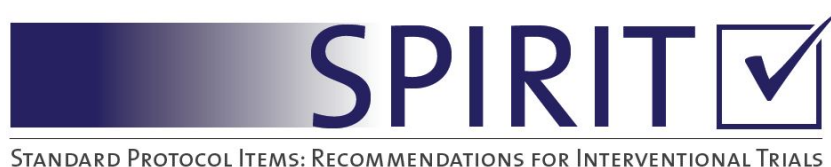

STANDARD PROTOCOL ITEMS: RECOMMENDATIONS FOR INTERVENTIONAL TRIALS

SPIRIT 2013 Checklist: Recommended items to address in a clinical trial protocol and related documents\*

| Section/item                      | Item No | Description                                                                                                                                                                                                                                                                                                       |
|-----------------------------------|---------|-------------------------------------------------------------------------------------------------------------------------------------------------------------------------------------------------------------------------------------------------------------------------------------------------------------------|
| <b>Administrative information</b> |         |                                                                                                                                                                                                                                                                                                                   |
| Title                             | 1       | Descriptive title identifying the study design, population, interventions, and, if applicable, trial acronym – <i>lines 1-2</i>                                                                                                                                                                                   |
| Trial registration                | 2a      | Trial identifier and registry name. If not yet registered, name of intended registry – <i>lines 68-70</i>                                                                                                                                                                                                         |
|                                   | 2b      | All items from the World Health Organization Trial Registration Data Set - <i>lines 68-69</i>                                                                                                                                                                                                                     |
| Protocol version                  | 3       | Date and version identifier – <i>line 70</i>                                                                                                                                                                                                                                                                      |
| Funding                           | 4       | Sources and types of financial, material, and other support <i>lines 500 - 504</i>                                                                                                                                                                                                                                |
| Roles and responsibilities        | 5a      | Names, affiliations, and roles of protocol contributors – <i>lines 4 – 13 and 482 - 487</i>                                                                                                                                                                                                                       |
|                                   | 5b      | Name and contact information for the trial sponsor – <i>lines 489 - 495</i>                                                                                                                                                                                                                                       |
|                                   | 5c      | Role of study sponsor and funders, if any, in study design; collection, management, analysis, and interpretation of data; writing of the report; and the decision to submit the report for publication, including whether they will have ultimate authority over any of these activities - <i>lines 497 - 498</i> |
|                                   | 5d      | Composition, roles, and responsibilities of the coordinating centre, steering committee, endpoint adjudication committee, data management team, and other individuals or groups overseeing the trial, if applicable (see Item 21a for data monitoring committee) <i>lines 392 - 398</i>                           |
| <b>Introduction</b>               |         |                                                                                                                                                                                                                                                                                                                   |
| Background and rationale          | 6a      | Description of research question and justification for undertaking the trial, including summary of relevant studies (published and unpublished) examining benefits and harms for each intervention - <i>lines 137 - 167</i>                                                                                       |
|                                   | 6b      | Explanation for choice of comparators - <i>lines 305 – 313</i>                                                                                                                                                                                                                                                    |
| Objectives                        | 7       | Specific objectives or hypotheses - <i>lines 179 - 198</i>                                                                                                                                                                                                                                                        |

1  
2 Trial design 8 Description of trial design including type of trial (eg, parallel group,  
3 crossover, factorial, single group), allocation ratio, and framework (eg,  
4 superiority, equivalence, noninferiority, exploratory) - *lines 171 - 177*  
5  
6  
7

8 **Methods: Participants, interventions, and outcomes**  
9

10 Study setting 9 Description of study settings (eg, community clinic, academic hospital)  
11 and list of countries where data will be collected. Reference to where  
12 list of study sites can be obtained – *lines 172 - 173, 492 - 496*  
13

14 Eligibility criteria 10 Inclusion and exclusion criteria for participants. If applicable, eligibility  
15 criteria for study centres and individuals who will perform the  
16 interventions (eg, surgeons, psychotherapists) - *lines 200 - 227*  
17  
18

19 Interventions 11a Interventions for each group with sufficient detail to allow replication,  
20 including how and when they will be administered – *lines 268 - 303*  
21  
22 11b Criteria for discontinuing or modifying allocated interventions for a  
23 given trial participant (eg, drug dose change in response to harms,  
24 participant request, or improving/worsening disease) – *line 186 – 195,*  
25 *237 – 239, 383 – 387*  
26  
27

28 11c Strategies to improve adherence to intervention protocols, and any  
29 procedures for monitoring adherence (eg, drug tablet return,  
30 laboratory tests) – *N/A*  
31

32 11d Relevant concomitant care and interventions that are permitted or  
33 prohibited during the trial – *lines 276 - 291*  
34

35 Outcomes 12 Primary, secondary, and other outcomes, including the specific  
36 measurement variable (eg, systolic blood pressure), analysis metric  
37 (eg, change from baseline, final value, time to event), method of  
38 aggregation (eg, median, proportion), and time point for each  
39 outcome. Explanation of the clinical relevance of chosen efficacy and  
40 harm outcomes is strongly recommended - *lines 179 – 198, 324 - 367*  
41  
42

43 Participant 13 Time schedule of enrolment, interventions (including any run-ins and  
44 timeline washouts), assessments, and visits for participants. A schematic  
45 diagram is highly recommended (see Figure) – *Figure 1.*  
46  
47

48 Sample size 14 Estimated number of participants needed to achieve study objectives  
49 and how it was determined, including clinical and statistical  
50 assumptions supporting any sample size calculations – *lines 241 -*  
51 *245*  
52  
53

54 Recruitment 15 Strategies for achieving adequate participant enrolment to reach  
55 target sample size – *229 – 234*  
56

57 **Methods: Assignment of interventions (for controlled trials)**  
58

59 Allocation:  
60

|    |                |     |                                                                                 |
|----|----------------|-----|---------------------------------------------------------------------------------|
| 1  |                |     |                                                                                 |
| 2  | Sequence       | 16a | Method of generating the allocation sequence (eg, computer-                     |
| 3  | generation     |     | generated random numbers), and list of any factors for stratification.          |
| 4  |                |     | To reduce predictability of a random sequence, details of any planned           |
| 5  |                |     | restriction (eg, blocking) should be provided in a separate document            |
| 6  |                |     | that is unavailable to those who enrol participants or assign                   |
| 7  |                |     | interventions – <i>lines 247 - 251</i>                                          |
| 8  |                |     |                                                                                 |
| 9  |                |     |                                                                                 |
| 10 | Allocation     | 16b | Mechanism of implementing the allocation sequence (eg, central                  |
| 11 | concealment    |     | telephone; sequentially numbered, opaque, sealed envelopes),                    |
| 12 | mechanism      |     | describing any steps to conceal the sequence until interventions are            |
| 13 |                |     | assigned – <i>lines 249 - 251</i>                                               |
| 14 |                |     |                                                                                 |
| 15 | Implementation | 16c | Who will generate the allocation sequence, who will enrol participants,         |
| 16 |                |     | and who will assign participants to interventions - <i>lines 230 – 239, 249</i> |
| 17 |                |     | - <i>251</i>                                                                    |
| 18 |                |     |                                                                                 |
| 19 |                |     |                                                                                 |
| 20 | Blinding       | 17a | Who will be blinded after assignment to interventions (eg, trial                |
| 21 | (masking)      |     | participants, care providers, outcome assessors, data analysts), and            |
| 22 |                |     | how - <i>lines 248 - 260</i>                                                    |
| 23 |                |     |                                                                                 |
| 24 |                |     |                                                                                 |
| 25 |                | 17b | If blinded, circumstances under which unblinding is permissible, and            |
| 26 |                |     | procedure for revealing a participant's allocated intervention during           |
| 27 |                |     | the trial – <i>lines 261 - 266</i>                                              |
| 28 |                |     |                                                                                 |

### Methods: Data collection, management, and analysis

|    |                 |     |                                                                                 |
|----|-----------------|-----|---------------------------------------------------------------------------------|
| 29 |                 |     |                                                                                 |
| 30 |                 |     |                                                                                 |
| 31 | Data collection | 18a | Plans for assessment and collection of outcome, baseline, and other             |
| 32 | methods         |     | trial data, including any related processes to promote data quality (eg,        |
| 33 |                 |     | duplicate measurements, training of assessors) and a description of             |
| 34 |                 |     | study instruments (eg, questionnaires, laboratory tests) along with             |
| 35 |                 |     | their reliability and validity, if known. Reference to where data               |
| 36 |                 |     | collection forms can be found, if not in the protocol – <i>lines 332 – 367,</i> |
| 37 |                 |     | <i>Figure 1</i>                                                                 |
| 38 |                 |     |                                                                                 |
| 39 |                 |     |                                                                                 |
| 40 |                 | 18b | Plans to promote participant retention and complete follow-up,                  |
| 41 |                 |     | including list of any outcome data to be collected for participants who         |
| 42 |                 |     | discontinue or deviate from intervention protocols – <i>N/A – pilot study</i>   |
| 43 |                 |     |                                                                                 |
| 44 |                 |     |                                                                                 |
| 45 | Data            | 19  | Plans for data entry, coding, security, and storage, including any              |
| 46 | management      |     | related processes to promote data quality (eg, double data entry;               |
| 47 |                 |     | range checks for data values). Reference to where details of data               |
| 48 |                 |     | management procedures can be found, if not in the protocol – <i>lines</i>       |
| 49 |                 |     | <i>333 – 335, 359 - 367</i>                                                     |
| 50 |                 |     |                                                                                 |
| 51 |                 |     |                                                                                 |
| 52 | Statistical     | 20a | Statistical methods for analysing primary and secondary outcomes.               |
| 53 | methods         |     | Reference to where other details of the statistical analysis plan can be        |
| 54 |                 |     | found, if not in the protocol – <i>lines 369 - 382</i>                          |
| 55 |                 |     |                                                                                 |
| 56 |                 | 20b | Methods for any additional analyses (eg, subgroup and adjusted                  |
| 57 |                 |     | analyses) – <i>lines 369 - 382</i>                                              |
| 58 |                 |     |                                                                                 |
| 59 |                 |     |                                                                                 |
| 60 |                 |     |                                                                                 |



- 1  
2  
3  
4  
5  
6  
7  
8  
9  
10  
11  
12  
13  
14  
15  
16  
17  
18  
19  
20  
21  
22  
23  
24  
25  
26  
27  
28  
29  
30  
31  
32  
33  
34  
35  
36  
37  
38  
39  
40  
41  
42  
43  
44  
45  
46  
47  
48  
49  
50  
51  
52  
53  
54  
55  
56  
57  
58  
59  
60
- 20c Definition of analysis population relating to protocol non-adherence (eg, as randomised analysis), and any statistical methods to handle missing data (eg, multiple imputation) – *lines 383 - 387*

### Methods: Monitoring

- Data monitoring 21a Composition of data monitoring committee (DMC); summary of its role and reporting structure; statement of whether it is independent from the sponsor and competing interests; and reference to where further details about its charter can be found, if not in the protocol. Alternatively, an explanation of why a DMC is not needed – *lines 393 - 399*
- 21b Description of any interim analyses and stopping guidelines, including who will have access to these interim results and make the final decision to terminate the trial – *N/A– interim analysis is not planned*
- Harms 22 Plans for collecting, assessing, reporting, and managing solicited and spontaneously reported adverse events and other unintended effects of trial interventions or trial conduct – *lines 185 – 195, 346 – 350*
- Auditing 23 Frequency and procedures for auditing trial conduct, if any, and whether the process will be independent from investigators and the sponsor – *lines 393 - 399*

### Ethics and dissemination

- Research ethics approval 24 Plans for seeking research ethics committee/institutional review board (REC/IRB) approval – *lines 408 – 410*
- Protocol amendments 25 Plans for communicating important protocol modifications (eg, changes to eligibility criteria, outcomes, analyses) to relevant parties (eg, investigators, REC/IRBs, trial participants, trial registries, journals, regulators) – *N/A – pilot study*
- Consent or assent 26a Who will obtain informed consent or assent from potential trial participants or authorised surrogates, and how (see Item 32) – *lines 413 - 431*
- 26b Additional consent provisions for collection and use of participant data and biological specimens in ancillary studies, if applicable – *N/A*
- Confidentiality 27 How personal information about potential and enrolled participants will be collected, shared, and maintained in order to protect confidentiality before, during, and after the trial – *lines 359 – 367*
- Declaration of interests 28 Financial and other competing interests for principal investigators for the overall trial and each study site – *lines 499 – 500, 508 – 510*
- Access to data 29 Statement of who will have access to the final trial dataset, and disclosure of contractual agreements that limit such access for investigators – *lines 359 – 364*

|    |                   |     |                                                                              |
|----|-------------------|-----|------------------------------------------------------------------------------|
| 1  |                   |     |                                                                              |
| 2  | Ancillary and     | 30  | Provisions, if any, for ancillary and post-trial care, and for               |
| 3  | post-trial care   |     | compensation to those who suffer harm from trial participation – <i>N/A</i>  |
| 4  |                   |     |                                                                              |
| 5  | Dissemination     | 31a | Plans for investigators and sponsor to communicate trial results to          |
| 6  | policy            |     | participants, healthcare professionals, the public, and other relevant       |
| 7  |                   |     | groups (eg, via publication, reporting in results databases, or other        |
| 8  |                   |     | data sharing arrangements), including any publication restrictions –         |
| 9  |                   |     | <i>lines 512 – 514</i>                                                       |
| 10 |                   |     |                                                                              |
| 11 |                   | 31b | Authorship eligibility guidelines and any intended use of professional       |
| 12 |                   |     | writers – <i>lines 484 – 489</i>                                             |
| 13 |                   |     |                                                                              |
| 14 |                   | 31c | Plans, if any, for granting public access to the full protocol, participant- |
| 15 |                   |     | level dataset, and statistical code – <i>lines 361 – 361</i>                 |
| 16 |                   |     |                                                                              |
| 17 |                   |     |                                                                              |
| 18 |                   |     |                                                                              |
| 19 | <b>Appendices</b> |     |                                                                              |
| 20 |                   |     |                                                                              |
| 21 | Informed consent  | 32  | Model consent form and other related documentation given to                  |
| 22 | materials         |     | participants and authorised surrogates – <i>N/A – consent only in Czech</i>  |
| 23 |                   |     | <i>language</i>                                                              |
| 24 |                   |     |                                                                              |
| 25 | Biological        | 33  | Plans for collection, laboratory evaluation, and storage of biological       |
| 26 | specimens         |     | specimens for genetic or molecular analysis in the current trial and for     |
| 27 |                   |     | future use in ancillary studies, if applicable – <i>N/A</i>                  |
| 28 |                   |     |                                                                              |
| 29 |                   |     |                                                                              |

---

30  
31  
32  
33  
34  
35  
36  
37  
38  
39  
40  
41  
42  
43  
44  
45  
46  
47  
48  
49  
50  
51  
52  
53  
54  
55  
56  
57  
58  
59  
60

\*It is strongly recommended that this checklist be read in conjunction with the SPIRIT 2013 Explanation & Elaboration for important clarification on the items. Amendments to the protocol should be tracked and dated. The SPIRIT checklist is copyrighted by the SPIRIT Group under the Creative Commons "[Attribution-NonCommercial-NoDerivs 3.0 Unported](https://creativecommons.org/licenses/by-nc-nd/3.0/)" license.
